## **Evidence accumulation, not “self-control,” explains dorsolateral prefrontal activation during normative choice**

Cendri A. Hutcherson<sup>1,2\*†</sup> and Anita Tusche<sup>3,4\*</sup>

<sup>1</sup> Department of Psychology, University of Toronto Scarborough, Toronto, ON M1C 1A4, Canada

<sup>2</sup> Department of Marketing, Rotman School of Management, University of Toronto, Toronto, ON M1C 1A4, Canada <sup>3</sup> Division of Humanities and Social Sciences <sup>4</sup> Departments of Psychology and Economics, Queen’s University, Kingston, ON

\* Both authors contributed equally.

† To whom correspondence should be addressed.

## Abstract

1 What role do cognitive control regions like the dorsolateral prefrontal cortex (dlPFC) play in  
2 normative behavior (e.g., generosity, healthy eating)? Some models suggest that dlPFC activation  
3 during normative choice reflects the use of control to overcome default hedonistic preferences.  
4 Here, we develop an alternative account, showing that an *attribute-based neural drift diffusion*  
5 *model (anDDM)* predicts trial-by-trial variation in dlPFC response across three fMRI studies and  
6 two self-control contexts (altruistic sacrifice and healthy eating). Using the anDDM to simulate a  
7 variety of self-control dilemmas generated a novel prediction: although dlPFC activity might  
8 *typically* increase for norm-consistent choices, deliberate self-regulation focused on normative  
9 goals should *decrease* or even *reverse* this pattern (i.e., greater dlPFC response for hedonic, self-  
10 interested choices). We confirmed these predictions in both altruistic and dietary choice contexts.  
11 Our results suggest that dlPFC response during normative choice may depend more on value-based  
12 evidence accumulation than inhibition of our baser instincts.

## 13 **Introduction.**

14 Self-control dilemmas typically involve trade offs between short-term, hedonic considerations and  
15 longer-term or more abstract standards and values. For example, social interactions often force an  
16 individual to weigh self-interest against norms favoring equity and other-regard. Similarly, dietary  
17 decisions often require weighing the immediate pleasure of consumption against personal  
18 standards or societal norms favoring healthy eating. Understanding when, why, and how people  
19 choose normatively-preferred responses (e.g., generosity over selfishness, healthy over unhealthy  
20 eating, etc.) has represented a central goal of the decision sciences for decades. What neural and  
21 computational processes must be engaged to support more normative behavior? What makes such  
22 choices frequently feel so conflicted and effortful, and how can we make them easier? To what  
23 extent does following social or personal norms depend on activation in brain regions associated  
24 with cognitive control, such as the dorsolateral prefrontal cortex (dlPFC)?

25  
26 Previous research has provided a wealth of evidence suggesting that the dlPFC may promote  
27 normative choices in both the social and non-social domain. For instance, compared to unhealthy  
28 food choices, healthier choices in successful dieters were accompanied by greater activation in a  
29 posterior region of the dlPFC<sup>1</sup>. Greater dlPFC response in a similar region has also been observed  
30 when individuals make normatively-favored choices in both social decision making<sup>2,3</sup> and  
31 intertemporal choice<sup>4,5</sup>. Moreover, activation in the dlPFC increases when individuals explicitly  
32 focus on eating healthy<sup>6</sup> or on decreasing craving for food<sup>7</sup>. Electrical disruption of this area also  
33 decreases patience<sup>8</sup> and reduces normative behavior in social contexts like the Ultimatum game<sup>9</sup>.  
34 Collectively, these results support the notion that the dlPFC may be recruited to modulate values

35 or bias choices in favor of normative responses, perhaps especially when those responses conflict  
36 with default preferences.

37  
38 Yet a variety of results seem inconsistent with this view. For example, researchers often fail to  
39 observe increased dlPFC recruitment when individuals make pro-social or intertemporally  
40 normative choices<sup>10-12</sup>. Moreover, electrical disruption of the dlPFC has been observed both to  
41 *decrease* appetitive valuation of foods<sup>13</sup>, and *increase* generous behavior in the Dictator Game<sup>9</sup>.  
42 Such findings conflict with the idea that this region consistently promotes normative concerns over  
43 immediate, hedonistic desires. Thus, how to predict whether and when one might observe a  
44 positive association between dlPFC response and choices typically associated with successful self-  
45 control remains unclear.

46  
47 Here, we propose a computational account of fMRI BOLD response in the dlPFC that may resolve  
48 many of these apparent inconsistencies. This account draws on prior research in both perceptual  
49 and value-based decision making, which consistently finds that the posterior dlPFC region  
50 associated with normative “self-control success” also activates during choices that are more  
51 difficult to discriminate in simple perceptual and value-based choices lacking a self-control  
52 conflict, e.g.,<sup>14-16</sup>. Our account is also inspired by findings that the dlPFC may be one hub in a  
53 larger neural circuit (encompassing additional regions like the dorsal anterior cingulate cortex  
54 [dACC], supplementary motor area [SMA] and inferior frontal gyrus/anterior insula [IFG/aIns])  
55 that selects actions for execution using a process of evidence accumulation and lateral inhibition  
56 among competing action representations<sup>17,18</sup>. Based on this evidence, we developed a  
57 computational model of self-control dilemmas that successfully predicts not only when an

58 individual will choose in normative rather than hedonistic fashion, but also when, why, and to  
59 what degree response in the dlPFC will be recruited during that process. We note also that,  
60 although we focus here on the dlPFC, our model also applies in theory when observing similar  
61 relationships to other brain areas frequently associated with conflict and cognitive control,  
62 including regions of the IFG/aIns and dACC.

63  
64 As with similar models of simple perceptual and value-based choices, our *attribute-based neural*  
65 *drift diffusion model* (anDDM) assumes that the brain makes decisions through a process of value-  
66 based attribute integration and competition (Figure 1). More specifically, choices are resolved via  
67 competitive interactions between neuronal populations that output responses based on  
68 accumulated information about the value of choice attributes, weighted by their momentary goal  
69 relevance. Some of these attributes are associated with hedonism (e.g., self-regarding concerns in  
70 altruistic choice) and some are associated with social norms and standards for behavior (e.g. other-  
71 regarding concerns). For expository purposes, we refer to these respectively as hedonic and  
72 normative attributes. Intuitively, whether our computational algorithm makes a hedonistic or  
73 normative choice depends not only on the magnitude of hedonic and normative attributes, but also  
74 on their weight: higher weights on normative attributes lead to more norm-consistent responses.

75  
76 What role does the dlPFC play in the anDDM? The observation of increased posterior dlPFC  
77 response when people choose consistently with normatively favored goals (e.g., healthy over  
78 unhealthy choices) has been taken to suggest that this region acts either to modulate the processing  
79 of attribute values or their weights in favor of normatively-favored goals<sup>1,6</sup>, or to inhibit hedonistic  
80 reward-related responding<sup>19,20</sup>. In contrast, we propose that activity in this region reflects processes

81 related to the *response selection stage* of decisions. This suggests that dlPFC response during  
82 normative choice represents a downstream consequence of valuation processes, rather than a direct  
83 causal influence upon them. To support this argument, we use the anDDM to simulate when and  
84 why we might observe greater activity in the dlPFC (and regions with similar response profiles)  
85 when resolving a choice. As we describe below, these simulations suggest that normative choices  
86 should be associated with greater neural activation in the dlPFC only when two things are true:  
87 hedonic attribute values *directly oppose* normative attribute values, and hedonic attributes receive  
88 *more weight* as inputs to the anDDM. In contrast, when normative attributes receive more weight,  
89 *hedonistic* choices should produce greater activity in the dlPFC and other areas associated with  
90 response selection.

91  
92 We then used these observations to make two predictions. First, if people by default favor hedonic  
93 over normative attributes, then most studies will observe greater dlPFC response when people  
94 choose the normatively-favored option. This prediction does not strongly distinguish our account  
95 from alternatives. However, our model makes a second, more novel prediction: if a normally  
96 hedonistic decision maker focuses on normative goals, this should *reduce* activation in the dlPFC  
97 when choosing the normatively-favored option. A straightforward reading of an attribute-  
98 weighting account predicts the opposite: a normally hedonistic individual who deliberately  
99 attempts to focus on normative responding should show *increased* activation in the dlPFC in order  
100 to alter attribute weighting in favor of normative goals<sup>19,21</sup>. We test these two alternative  
101 predictions across three studies and two canonical self-control contexts in which people frequently  
102 struggle to align their actual behaviors with normative goals: altruistic and dietary choice. In all  
103 cases, results strongly supported the predictions of the anDDM. These findings raise new and

104 important questions regarding the role of the dlPFC— and effortful self-control more generally – in  
105 promoting normative choice.

106

## 107 **Results**

### 108 *Simulating the dilemma of self-control*

109         Although self-control dilemmas can take a variety of forms, for expository purposes we  
110 here take a single, typical self-control dilemma: a decision maker deciding whether to indulge in  
111 a decadent snack or opt for something healthier. This example allows us to capture two critical  
112 features: first, self-control dilemmas typically involve making decisions about options that vary in  
113 the magnitude or value of hedonic and normative attributes (e.g. tastiness and healthiness). Second,  
114 the decision-maker must weigh these attributes based on goals that can vary in their relative  
115 strength at different times. At a nice restaurant, tastiness may be prioritized. When trying to lose  
116 weight, healthiness is prioritized. We used simulations to explicitly capture these two features.

117

118 Simulations were realized using a neural network instantiation of our anDDM<sup>18</sup> where choices  
119 result from dynamic interactions between two separate but intermingled pools of neurons  
120 representing the different options under consideration (Figure 1). Activation in each pool  
121 accumulates noisily based on a combination of external inputs from hedonic and normative  
122 attributes weighted by their current subjective importance, inhibitory inputs from the other pool,  
123 and recurrent self-stimulation (see Methods for details). This model generated predictions for how  
124 *magnitudes* and *weights* for hedonic and normative attributes influence the likelihood of a virtuous  
125 (i.e., healthy) choice, response time [RT], and neural response. These simulations yielded three  
126 key observations about behavior and neural response, which we describe in the context of food

127 choice but apply in theory across any self-control dilemma that requires weighing hedonic rewards  
 128 against normative values and goals.  
 129

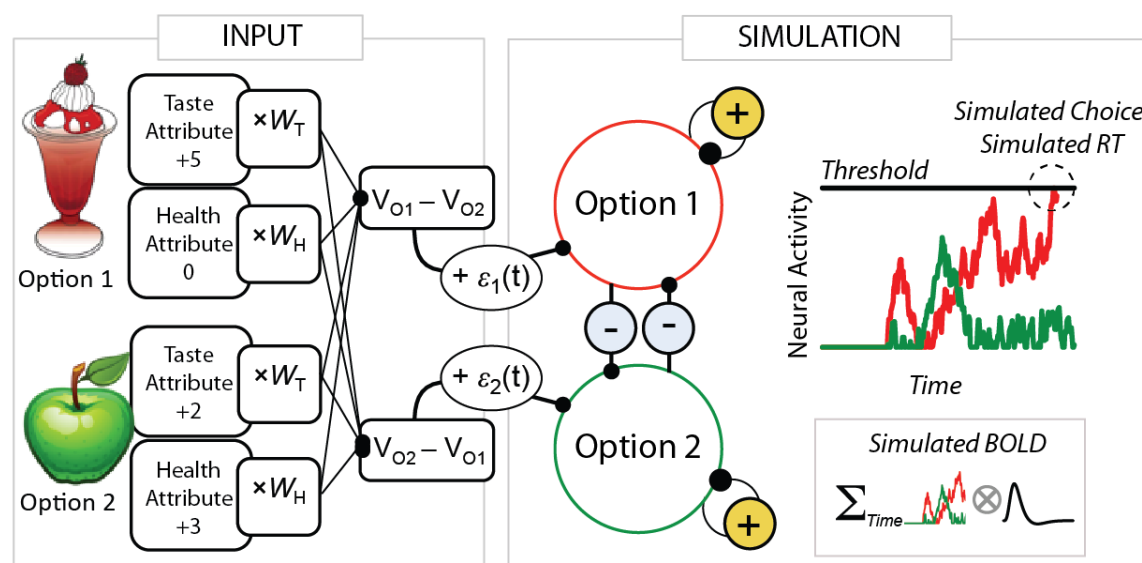

130  
 131 **Figure 1.** Attribute-based neural drift diffusion model (anDDM) of normative choice. Each  
 132 option's hedonic and normative attributes (e.g., tastiness = +5 and healthiness = 0 for the sundae)  
 133 are weighted by their current importance (e.g.,  $w_{Taste}$  [ $W_T$ ] and  $w_{Health}$  [ $W_H$ ]) and summed to  
 134 construct relative option values [ $V_{O1} - V_{O2}$ ]. These values, corrupted by momentary noise at time  
 135  $t$  [ $\varepsilon_1(t)$ ], serve as the external inputs to two mutually inhibitory neuronal pools representing the two  
 136 options. Neural activation in these two pools (red and green lines in upper right plot) accumulates  
 137 over time until one hits a predefined threshold, determining both the simulated response time (RT)  
 138 and the simulated choice. Choices are classified as normative if the option with higher normative  
 139 attribute value (in this case, higher healthiness, i.e. the apple in option 2) is selected. The sum of  
 140 neural activation across the two pools can be used to simulate expected neural signals at the time  
 141 of choice, and can be convolved with the canonical hemodynamic response function to construct  
 142 a predicted BOLD signal for each choice (lower right inset).  
 143

144  
 145 *Observation 1: The likelihood of a normative choice depends on the value of hedonic and*  
 146 *normative attributes. To capture the idea that some choices (e.g. ice cream vs. Brussels sprouts)*  
 147 *represent more of a self-control conflict than others (e.g. strawberries vs. lard), we simulated a*  
 148 *single decision maker facing choices between hypothetical options that independently varied the*



149 relative value of normative and hedonic attributes (e.g. the foods' relative healthiness and tastiness).  
150 In the context of food choice, we classified a simulated choice as normative (healthy) when the  
151 simulation selected the option with higher healthiness. Choices were classified as hedonistic  
152 (unhealthy) otherwise. To determine the effect of current behavioral goals, we simulated the  
153 decision maker's choices for a variety of different weights on healthiness ( $w_{Health}$ ) and tastiness  
154 ( $w_{Taste}$ ).

155  
156 Figure 2a illustrates how variation in tastiness and healthiness of an option relative to the  
157 alternative affects a decision maker's *general* propensity to make a healthy choice (i.e., averaging  
158 over different instances of  $w_{Taste}$  and  $w_{Health}$ ). As can be seen, the magnitude and sign of the two  
159 attributes matters: she tends to choose more healthily when one option dominates on both  
160 healthiness and tastiness (no-conflict trials). She chooses less healthily when one option is tastier  
161 while the other is healthier (conflict trials). She is least likely to choose normatively when the  
162 difference in tastiness is large and the difference in healthiness is small. Thus, our simulations  
163 make the commonsense prediction that attribute values matter in determining the overall likelihood  
164 that an individual makes a healthy/normative choice.

165  
166 *Observation 2: The likelihood of a normative choice depends on weights given to normative and*  
167 *hedonic attributes.* We next attempted to capture the idea that an individual might vary from  
168 context to context in the goals that they prioritize, and that the essence of self-control is to prioritize  
169 (i.e., assign a higher weight to) normative attributes like healthiness, or to deprioritize (i.e., assign  
170 a lower weight to) hedonic attributes like tastiness. We thus simulated the decision maker in  
171 different goal states by assuming different weights on hedonic and normative attributes (i.e.

172 tastiness and healthiness). We show two example simulations in Figure 2b-d. Unsurprisingly, the  
 173 decision maker chooses healthily less frequently when weight on tastiness is higher than weight  
 174 on healthiness. However, these differences are starkest in conflict trials, and essentially vanish for  
 175 no-conflict trials (Figure 1d).

176

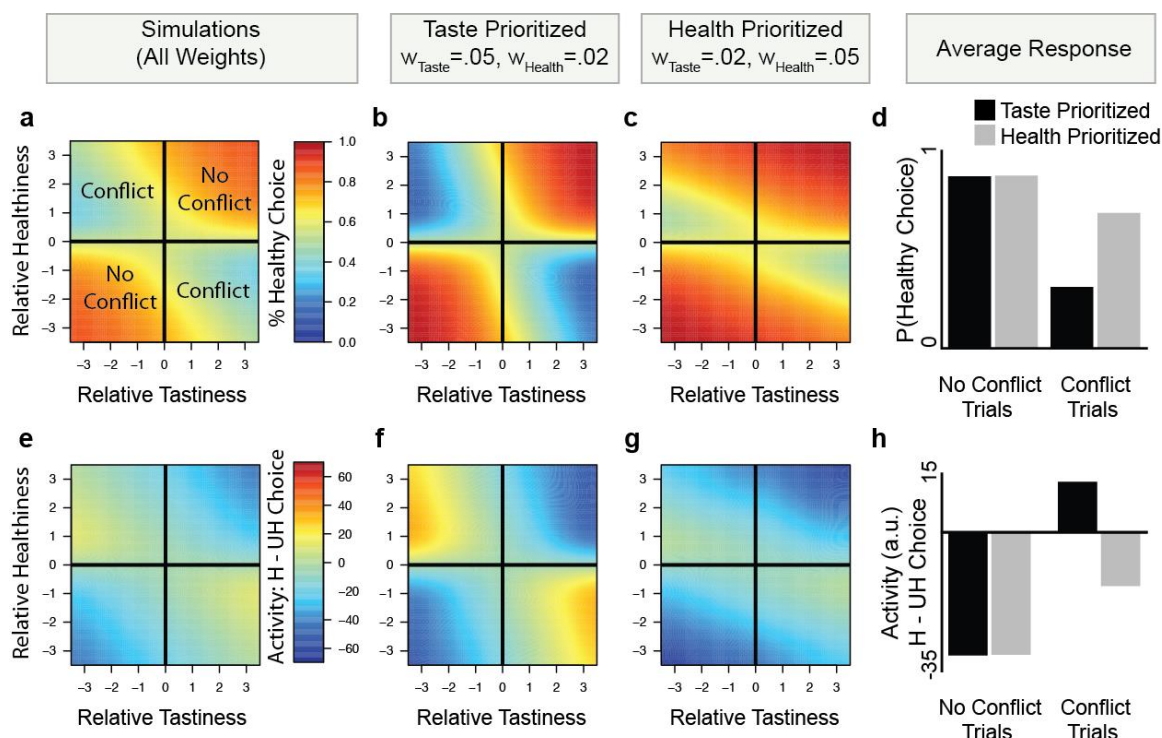

177

178 **Figure 2.** Simulating the dilemma of self-control. Top: The computational model can be used to  
 179 simulate decision making for any self-control context requiring an integration of normative and  
 180 hedonistic considerations (healthy eating displayed). (a) On average across multiple different goals,  
 181 the likelihood of a healthy choice depends on the relative attribute values of one option vs. another,  
 182 and is less likely when tastiness and healthiness conflict. Warmer colors indicate a higher  
 183 likelihood of choosing the healthier option. Specific goals (b) prioritizing tastiness or (c)  
 184 prioritizing healthiness alter the overall frequency of healthy choice, although in both contexts  
 185 unhealthy choices are more likely for large differences in tastiness and small differences in  
 186 healthiness. (d) The overall likelihood of a healthy choice (averaged for all combinations of  
 187 conflict or no conflict choices). Goals prioritizing tastiness (black bars) produce fewer healthy  
 188 choices than goals prioritizing healthiness (gray bars), but only when tastiness and healthiness  
 189 conflict. Bottom: e-g) The computational model can also simulate expected neural activity (i.e.  
 190 aggregate activity in the two neuronal pools, summed over decision time:  $\sum_{Time} Option1 +$   
 191  $Option2$ ) when choosing healthy [H] or unhealthy [UH] options, as a function of relative option  
 192 values and different goals. Warmer colors indicate more activity when a healthy choice was made

193 (i.e., Activity<sub>H</sub> > Activity<sub>UH</sub>). **h)** Overall difference in neural activity for H compared to UH  
194 choices for goals prioritizing tastiness (black bars) and healthiness (gray bars), divided as a  
195 function of attribute conflict. In no conflict trials, healthy choices elicit less activity regardless of  
196 goal (i.e. Activity<sub>H</sub> < Activity<sub>UH</sub>). In conflict trials, however, healthy choices elicit more activity  
197 (i.e. Activity<sub>H</sub> > Activity<sub>UH</sub>), but only when goals prioritize tastiness. Identical results are obtained  
198 when substituting RT for neural response (see Supplementary Figure 1).

---

199  
200  
201 *Observation 3. Normative choices result in higher neural response only if attributes conflict and*  
202 *the decision maker weights hedonic attributes more.* The last and most important goal of our  
203 computational model simulations was to examine how neural response in a cognitive control  
204 region like the dlPFC (assuming its activity correlates with the anDDM) might depend on weights  
205 given to hedonic and normative attributes (Figure 2e-h). We characterized this simulated response  
206 as aggregate activity of the two neuronal pools, summed over the duration of the choice, as this is  
207 what would contribute to observable BOLD responses.

208  
209 Comparing differences in simulated neural response for healthy and unhealthy choices yields two  
210 important conclusions. First, when options do not conflict on healthiness or tastiness (i.e. one  
211 option is better on both), healthy choices generally elicit *less* activity than unhealthy ones (Figure  
212 2e). Notably, for no-conflict trials this holds true irrespective of whether a decision maker is  
213 currently prioritizing tastiness or healthiness (Figure 2f-g). Second, and more importantly, when  
214 attributes *conflict*, network activity during healthy vs. unhealthy choices shows a striking  
215 dependence on an individual's goals (i.e. the relative balance of  $w_{Health}$  and  $w_{Taste}$ ). In conflict trials,  
216 hedonism-favoring goals (i.e.,  $w_{Taste} > w_{Health}$ ) result in higher activity on average when choosing  
217 healthily (Figure 2h). This difference becomes exaggerated as the magnitudes of tastiness and  
218 healthiness increase (Figure 2f). In contrast, when goals prioritize normative attributes like

219 healthiness (i.e.,  $w_{\text{Health}} > w_{\text{Taste}}$ ), simulated neural responses are *lower* on average for healthy  
220 compared to unhealthy choices (Figure 2g,h). Thus, neural response is positively associated with  
221 normative choice (i.e., greater neural activity to choose normatively instead of hedonistically) only  
222 when the decision maker places a higher weight on hedonistic than normative attributes. The same  
223 is true of simulated RTs, which are often used as a proxy for both choice difficulty and the presence  
224 of control (Supplementary Figure 1). Thus, in the anDDM the observation that normative choices  
225 activate brain areas associated with cognitive control might simply indicate that hedonic attributes  
226 are currently weighted more highly.

227

### 228 *Testing computational predictions using fMRI data*

229 *The anDDM accurately predicts dlPFC activity across a variety of contexts.*

230 It is currently unknown whether activity in the dlPFC region frequently associated with self-control  
231 might reflect activation patterns in the anDDM in the same manner as simple choice<sup>18</sup>. We thus  
232 began by verifying that trial-by-trial simulated neural activity in the anDDM correlated with  
233 activity in this region for complex, multi-attribute choices typical of different real-world self-  
234 control dilemmas. Note that, while this correlation could occur because the dlPFC performs the  
235 precise computations carried out by the anDDM, such a correlation could also occur if the dlPFC  
236 performs separate computational functions that activate proportionally to anDDM activity. In  
237 either case, we would expect trial-by-trial activity of the dlPFC to correlate with predictions of the  
238 anDDM.

239

240 Our analysis focused on three previously-collected fMRI datasets<sup>22,23</sup> (see Methods for details).  
241 Study 1 (N = 51) and Study 2 (N = 49) utilized an Altruistic Choice Task trading off different

242 monetary outcomes for self and an anonymous partner in a modified version of a Dictator game  
243 (Figure 3a, b, see Methods for details). Study 3, completed on a subset of participants from Study  
244 2 (N = 36), utilized a Food Choice Task (Figure 3c) with different foods varying in tastiness and  
245 healthiness. In Study 1, choices were made with the instruction to simply choose the most-  
246 preferred option. In Studies 2 and 3, participants made choices in three separate conditions that  
247 manipulated goals/attribute weights by instructing participants to focus on different normative or  
248 hedonic attributes (a point we return to below). Studies 1 and 2 involved only trials involving  
249 conflict between hedonic and normative attributes. Study 3 included trials both with and without  
250 such conflict.

251

252

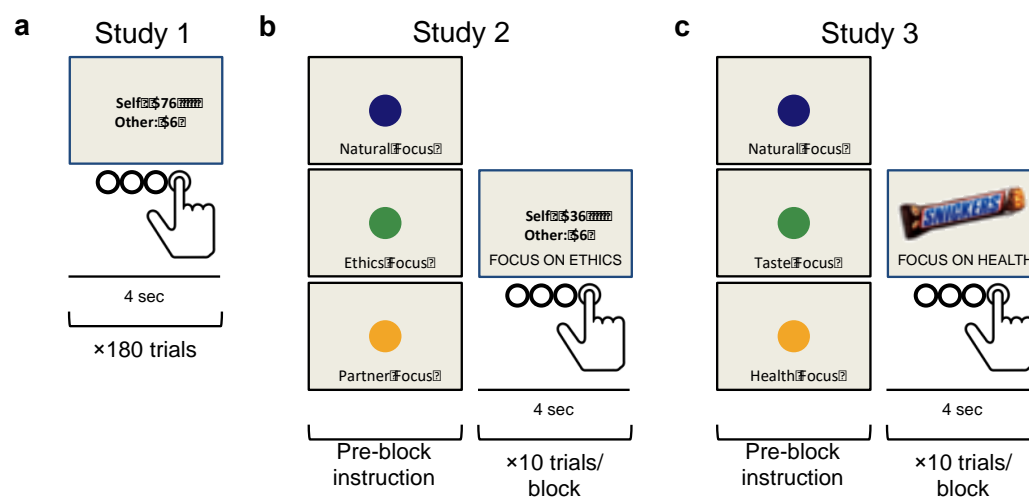

253

254 **Figure 3.** FMRI task designs. (a) In Study 1, participants made choices involving tradeoffs  
255 between monetary payoff for another person (\$Other; normative attribute) and for themselves  
256 (\$Self; hedonic attribute) in an Altruistic Choice Task. (b) In Study 2, participants made choices  
257 similar to the Altruistic Choice Task in Study 1, while we manipulated the *weights* on normative  
258 and hedonic attributes using instructions presented at the beginning of each task block. These  
259 instructions asked participants to focus on different pro-social motivations (ethical considerations,  
260 partner's feelings) as they made their choice. (c) In Study 3, we examined the generalizability of  
261 the model-based predictions in another choice domain. Here, we manipulated weights on food's  
262 healthiness (normative attribute) and tastiness (hedonic attribute) using a Food Choice Task. In all

263 studies, participants had 4 seconds to decide, and gave their response on a 4-point scale from  
264 “Strong No” to “Strong Yes”.

---

265

266 We predicted that dlPFC activity should correlate parametrically with simulated activity of the  
267 anDDM during self-control dilemmas. To test this notion, we first fit computational parameters of  
268 the anDDM to each participant’s behavior (see Supplemental Figure 2 for model fits). We then  
269 asked whether parametric variation in the measured BOLD signals within the dlPFC ROI  
270 correlated with simulated response across all three fMRI studies (see Methods for detail). To this  
271 end, data of each study were thresholded at a voxel-wise  $P < .001$ , and a cluster-defining threshold  
272 of  $P < .05$ , small-volume corrected within a 10-mm spherical region of interest (ROI) centered on  
273 the peak coordinates of activity for the contrast of normative (healthy) vs. hedonistic (unhealthy)  
274 choice in a previous study of self-control in dieters<sup>1</sup>. The results of a three-way conjunction at this  
275 a priori threshold show that anDDM responses correlate with activation in the dlPFC across all  
276 three data sets (Figure 4a, center-of-mass  $x = -56$ ,  $y = 19$ ,  $z = 21$ ). Results for our key questions  
277 reported below (Figure 4 e-f) are based on the dlPFC cluster identified in this conjunction analysis.  
278 Supplemental analyses confirmed that simulated activity of the anDDM covaried with observed  
279 BOLD responses in the DLPFC in each condition of Study 2 and 3.

280

281 Intriguingly, although they are not the focus of this study, we also observed a whole-brain  
282 corrected conjunction of activation across all three studies in two other regions often associated  
283 with conflict and cognitive control: the dorsal anterior cingulate cortex (dACC) and anterior  
284 insula/inferior frontal gyrus ( $P_s < .001$ , whole-brain corrected across all three studies,  
285 Supplemental Figures S3 and S4). No other regions showed a similarly consistent, three-way  
286 conjunction across all three studies.

287  
288 *Recruitment of the dlPFC when choosing normatively only occurs when goals are hedonistic and*  
289 *attributes conflict (Observation #3).*

290 The preceding analysis confirmed that activity in the left dlPFC covaries with predicted activity  
291 simulated in the anDDM in three independent fMRI studies. We next confirmed the central  
292 prediction of our simulations concerning the relationship between normative choices and activity  
293 in the dlPFC. In particular, models suggesting that the dlPFC promotes normative choices<sup>1,6,20</sup>  
294 imply that norm-consistent choices should be accompanied by greater activation in the dlPFC (as  
295 has been observed previously). Moreover, this should be especially true when people focus on  
296 normative goals<sup>6,7</sup>, since those goals support norm-sensitive behavior and might require the  
297 override of default hedonistic preferences<sup>19,24</sup>. The anDDM makes the opposite prediction. While  
298 neural activity in the model (and by extension the dlPFC) *can* be higher for normative compared  
299 to hedonistic choices, this should be true only when goals lead to stronger weighting of hedonic  
300 attributes and attribute values conflict (c.f. Figure 2h). Thus, if a regulatory focus on normative  
301 attributes increases their weight in the evidence accumulation process, this should increase  
302 normative choices, but result in *lower*, not higher, neural activity for those choices. We tested these  
303 predictions by performing a region-of-interest (ROI) analysis in the dlPFC region identified by the  
304 three-way conjunction above, examining the contrast of activity for normative compared to  
305 hedonistic choices in different contexts. In Study 1 (altruistic choice) this involved choices made  
306 only during natural, unregulated decision making. In Study 2 (altruistic choice) and Study 3 (food  
307 choice) we examined choices made under different regulatory goals that were designed to increase  
308 or decrease weights on hedonic and normative attributes (i.e. self and other in altruistic choice,  
309 tastiness and healthiness in food choice).



310  
311 *Generous vs. selfish choices (Study 1)*. In Study 1, choices were defined as normative (i.e.,  
312 generous) if the participant selected the option with less money for themselves and more money  
313 for their partner. Choices were defined as hedonistic (i.e., selfish) otherwise. Weights from the  
314 best-fitting model parameters indicated that subjects naturally placed more weight on their own  
315 outcomes (mean  $w_{Self} = .0036 \pm .0011$  s.d.) than the other person's outcomes (mean  $w_{Other}$   
316  $= .0008 \pm .0015$ , paired- $t_{50} = 12.37$ ,  $P = 2.2 \times 10^{-16}$ ) or on fairness (i.e.,  $|Self - Other|$ , mean  $w_{Fairness}$   
317  $= .0008 \pm .001$ , paired- $t_{50} = 8.30$ ,  $P = 7.82 \times 10^{-11}$ ). Given the higher weight on self-interest, a  
318 hedonic attribute, and the fact that all trials in this study involved conflict between normative and  
319 hedonic attributes, we predicted that we should observe greater neural response when people chose  
320 generously. An ROI analysis of BOLD response in the dlPFC for generous vs. selfish choices  
321 strongly supported this prediction (Figure 4d, paired- $t_{43} = 2.98$ ,  $P = .005$ ). A whole-brain analysis  
322 confirmed that this pattern was specific to the dlPFC, as well as the dACC and insula/IFG regions  
323 also associated with the anDDM, rather than a general property of neural activity (see  
324 Supplementary Table 3 for details).

---

325



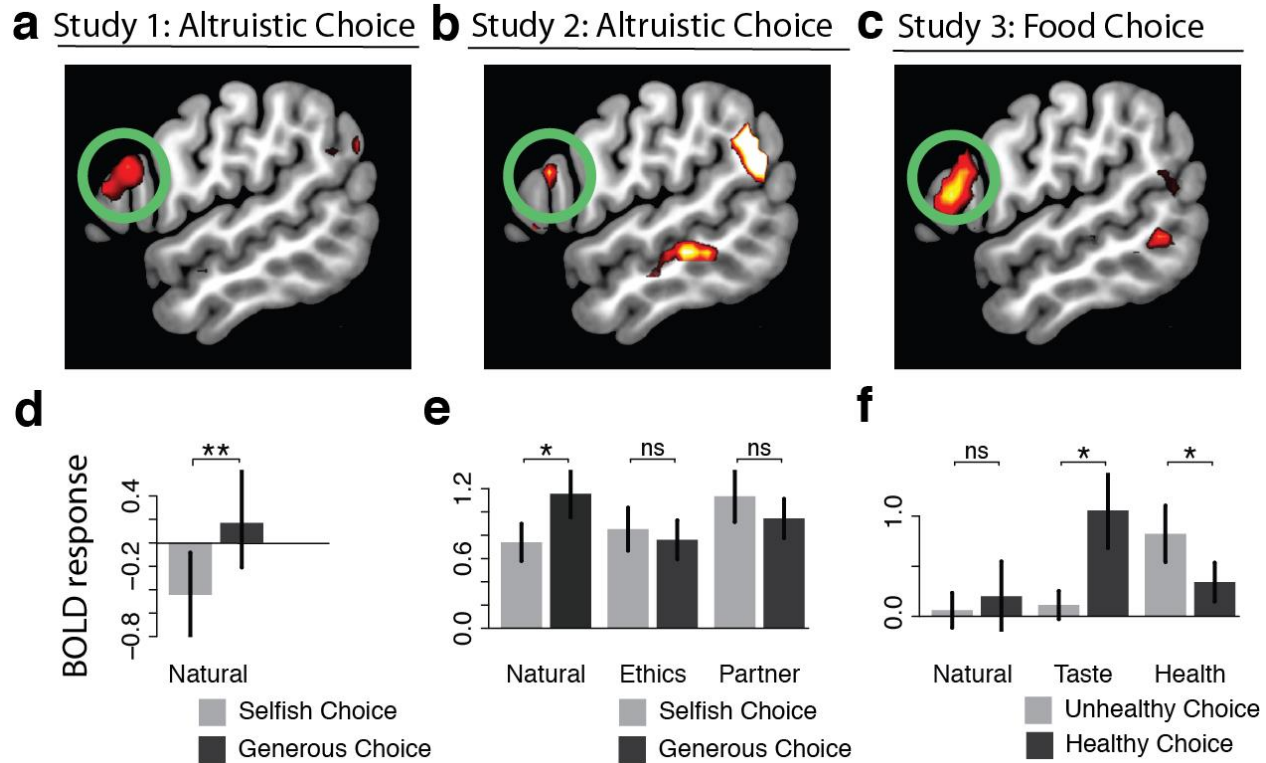

326

327 **Figure 4.** BOLD responses in the left dlPFC during self-control dilemmas. Top: Trial-by-trial  
 328 BOLD response in the dlPFC correlates with predicted activity of the anDDM across three separate  
 329 studies, including during both altruistic choice (**a**, **b**) and during dietary choice (**c**). All maps  
 330 thresholded at  $P < .001$  uncorrected for display purposes. Bottom: Within the dlPFC ROI defined  
 331 by the three-way conjunction of anDDM response across all studies, BOLD response during  
 332 normative choice (black) vs. hedonistic choice (light gray) when attributes conflict, in **d**) Study 1  
 333 for all trials, as well as in **e**) Study 2 and **f**) Study 3 as a function of regulatory goals. As predicted,  
 334 normative choices activate the dlPFC, but only when goals result in a greater weight on hedonic  
 335 than normative attributes. \*  $P < .05$ ; \*\*  $P < .01$ .

336

337

338

339 *Regulatory effects on generous vs. selfish responding (Study 2).* In Study 2 (also anonymous

340 altruistic decision making and conflict trials only), we sought to replicate and extend these results.

341 More specifically, we sought to test the anDDM prediction that if regulatory goals increase the

342 weight on normative attributes, this should result in *decreased* activation in the dlPFC when

343 choosing normatively. To manipulate weights on hedonic and normative attributes, we used an

344 instructed cognitive regulation manipulation in which we asked participants on different trials  
345 either to “Respond Naturally” (mirroring the natural preferences expressed by participants in Study  
346 1) or to focus on one of two different goals (“Focus on Ethics” [Ethics], “Focus on your Partner’s  
347 Feelings” [Partner]) that both emphasize normative attributes, but in different ways (see Methods  
348 for details). To confirm that the manipulation influenced attribute weights, we performed one-way  
349 repeated-measures ANOVAs with condition (Natural, Ethics, Partner) as a fixed effect and best-  
350 fitting attribute weight parameters  $w_{\text{Self}}$ ,  $w_{\text{Other}}$ , and  $w_{\text{Fairness}}$  as dependent variables. This analysis  
351 confirmed that our manipulation yielded significantly different weights on the attributes across the  
352 conditions (all  $F_{2,96} > 13.54$ , all  $P < 6.59 \times 10^{-6}$ , see Methods for details of model fitting). As  
353 expected, weights for self-interest (a hedonic attribute,  $w_{\text{Self}}$ ) were highest in the Natural condition  
354 ( $M_{\text{Natural}} = .0073 \pm .0035$  s.d.), lower in the Ethics condition ( $M_{\text{Ethics}} = .0061 \pm .0047$ ), and lowest in  
355 the Partner condition ( $M_{\text{Partner}} = .0037 \pm .0065$ ). By contrast, weights on the partner’s outcomes and  
356 fairness (attributes related more strongly to social norms) increased with regulation ( $w_{\text{Other}}$ :  $M_{\text{Natural}}$   
357 =  $.0010 \pm .0038$ ,  $M_{\text{Ethics}} = .0041 \pm .0045$ ,  $M_{\text{Partner}} = .0051 \pm .0038$ ;  $w_{\text{Fairness}}$ :  $M_{\text{Natural}} = .0017 \pm .0033$ ,  
358  $M_{\text{Ethics}} = .0053 \pm .0046$ ,  $M_{\text{Partner}} = .0024 \pm .0035$ ).

359  
360 Having confirmed that the regulatory focus manipulation altered weights on hedonic and  
361 normative attributes, we next asked if this manipulation affected BOLD response during generous  
362 vs. selfish choice in the dlPFC, consistent with predictions of the anDDM. In particular, given that  
363 all trials involved conflict between normative and hedonic attributes, we predicted that in the  
364 Natural condition, where participants generally placed higher weight on self-interest (a hedonic  
365 attribute), *generous* choices should elicit higher activation. In contrast, in the Partner condition,  
366 which elicited higher weight on normative attributes (i.e., other’s outcomes and fairness), *selfish*

367 choices should elicit the greatest activity in the dlPFC. The Ethics condition, which elicited similar  
368 weights across the attributes, should lie in between.

369  
370 To test these predictions, we performed one-way repeated measures ANOVAs with condition  
371 (Natural, Ethics, Partner) as a fixed effect and average BOLD response in the dlPFC ROI for the  
372 contrast of generous vs. selfish choice as the dependent variable. This analysis revealed a  
373 significant effect of condition on dlPFC response ( $F_{2,96} = 4.67$ ,  $P = .01$ ). Post-hoc planned  
374 comparisons confirmed that in the Natural condition, generous choices elicited significantly  
375 greater activity in the dlPFC ( $P = .04$ , Figure 4e), replicating the observed difference during  
376 Natural choices of Study 1. By contrast, in the Ethics and Partner focus conditions, generous  
377 choices no longer elicited significantly greater activation. Instead, *selfish* choices elicited *greater*  
378 activation, although the effect did not reach statistical significance. Thus, in the same individuals,  
379 the association between generous choices and *higher* activation in the dlPFC depended on whether  
380 goals emphasized selfishness rather than social norms (Figure 4e). Supplemental whole-brain  
381 analyses confirmed these findings (see Supplementary Results, and Supplementary Table 3 for  
382 details).

383  
384 *Regulatory effects on healthy vs. unhealthy choice (Study 3)*. In Study 3, we sought to replicate the  
385 finding that a regulatory focus on normative attributes reduces activation in the dlPFC, but in a  
386 new, non-social domain: healthy eating. During the Food Choice Task in Study 3, we manipulated  
387 attribute weights by instructing participants either to “Respond Naturally”, “Focus on Health”, or  
388 “Focus on Taste” while making their choice. Normative (i.e., healthy) choices were defined as  
389 selecting the food with higher subjectively perceived healthiness (see Methods for details). Note

390 that the “Focus on Health” instruction aimed to increase weight on healthiness ( $w_{\text{Health}}$ ), a  
391 normative attribute. Extending results of Study 2, the “Focus on Taste” condition was designed to  
392 enhance the weight on tastiness ( $w_{\text{Taste}}$ ), the hedonic attribute, which should preserve or even  
393 enhance the difficulty of normative choices that we observed in natural choice settings in study 1  
394 and 2. This allowed us to verify that our findings are specifically driven by changes in weights,  
395 not simply because we asked participants to perform a cognitive task.

396  
397 To confirm that the regulatory manipulation influenced attribute weights, we performed one-way  
398 repeated-measures ANOVAs, similar to Study 2, with condition (Natural, Taste, Health) as a fixed  
399 effect and estimated attribute weight parameters  $w_{\text{Taste}}$  and  $w_{\text{Health}}$  as dependent variables. This  
400 analysis confirmed that our manipulation yielded significantly different weights on the different  
401 attributes across the conditions (all  $F_s > 104.2$ , all  $P < 2.2 \times 10^{-6}$ ). As expected, weights on tastiness  
402 (a hedonic attribute) were highest in the Taste condition ( $M_{\text{Taste}} = 0.0077 \pm 0.0029$ ), similar but  
403 slightly lower in the Natural condition ( $M_{\text{Natural}} = 0.0074 \pm 0.0027$ ) and lowest in the Health condition  
404 ( $M_{\text{Health}} = 0.002 \pm 0.0028$ ). Weights on healthiness (a normative attribute) showed the opposite  
405 pattern, being lowest in the Taste condition ( $M_{\text{Taste}} = -0.0008 \pm 0.0018$ ), similar though slightly  
406 higher in the Natural condition ( $M_{\text{Natural}} = -0.0002 \pm 0.0018$ ) and highest in the Health condition  
407 ( $M_{\text{Health}} = 0.0055 \pm 0.0034$ ).

408  
409 Given these weights, we predicted that on the subset of trials involving conflict between  
410 healthiness and tastiness, healthy compared to unhealthy choices should elicit the greatest  
411 activation in the dlPFC in the Taste condition. In contrast, *unhealthy* choices should elicit greater  
412 activation in the Health condition. The Natural condition should lie in between these two extremes,

413 being more similar to the Taste condition. To test these predictions, we performed a one-way  
414 repeated measures ANOVA, similar to Study 2, with condition (Natural, Taste, Health) as a fixed  
415 effect and the average dlPFC BOLD response in the contrast of healthy vs. unhealthy choice  
416 (limited to trials with attribute conflict) as the dependent variable. As hypothesized, this analysis  
417 revealed a significant effect of condition on response ( $F = 4.269$ ,  $P = .018$ ). Follow-up t-tests  
418 confirmed the predicted direction of activation (Figure 4f). BOLD response during healthy  
419 compared to unhealthy choices was significantly greater in the Taste condition for the dlPFC  
420 (paired- $t_{32} = 2.67$ ,  $P = .01$ ). In the Health condition by contrast, activity was significantly greater  
421 for *unhealthy* choices in the left dlPFC (paired- $t_{34} = 2.061$ ,  $P = .05$ ). Response for healthy vs.  
422 unhealthy choice in the Natural condition lay in between these two extremes. Thus, in the same  
423 individuals, healthy choices could be accompanied by *higher* activation in brain regions typically  
424 associated with cognitive control (when goals emphasized hedonism), or *lower* activation (when  
425 goals emphasized health norms). Supplemental whole-brain analyses confirmed that this pattern  
426 of results was specific to the dlPFC and other regions associated with the anDDM (see  
427 Supplementary Results, and Supplementary Table 3 for details).

428

429 *Regulatory effects in the absence of conflict (Study 3).*

430 Our analyses so far focused on conflict trials, since simulations suggest that these trials show the  
431 biggest differences as a function of attribute weights (Figure 2). The design of Study 3, which  
432 included a subset of trials with no attribute conflict, also allowed us to test one further prediction  
433 of the anDDM. In Observation #3, we found that normative choices should only be associated with  
434 increased neural activity *when hedonic and normative attributes conflict* (Figure 2h). When  
435 attributes do *not* conflict, the anDDM predicts that normative choices should on average result in

436 *lower* neural response. Moreover, the anDDM suggests smaller differences in response across goal  
437 contexts favoring hedonism or health norms. This suggests that, in contrast to conflicted choices,  
438 there should be less effect of regulatory focus on dlPFC response during no-conflict choices.

439  
440 To test this prediction, we first performed a one-way repeated measures ANOVA with condition  
441 (Natural, Taste, Health) as a fixed effect and the average BOLD in the dlPFC for the contrast of  
442 healthy vs. unhealthy choice as the dependent variable, focusing only on the subset of trials with  
443 no conflict between tastiness and healthiness of a food (i.e., when the value of the option was  
444 positive or negative for both). As predicted, there was no significant influence of regulatory  
445 condition on the difference in neural activity between healthy and unhealthy choice ( $F_{2,68} = 0.477$ ,  
446  $P = .62$ ). Given this lack of effect across conditions, we averaged the three conditions together to  
447 analyze the main effect of healthy vs. unhealthy choice. This analysis indicated that healthy choices  
448 were accompanied by non-significantly *lower* response in this region (paired- $t_{35} = 1.51$ ,  $p = .07$ ,  
449 one-tailed). Results in other regions correlating with the anDDM, including the dACC and  
450 insula/IFG showed an even stronger pattern (see Supplemental Results for more details). In other  
451 words, as expected from model simulations, activation in the dlPFC for normative choices when  
452 normative and hedonic attributes did not conflict is generally low, and shows little to no effect of  
453 regulatory focus or the relative weight on tastiness and healthiness.

454  
455 *Regulation-related differences in overall activation (Studies 2 & 3).*

456 Our analyses so far confirm predicted patterns of response in the dlPFC during normative choice,  
457 suggesting that altering weights on normative vs. hedonic attributes alters the association between  
458 the dlPFC and normative choice. This raises the obvious question: which regions of the brain

459 produce these changes in weight? Some models attribute this role to the dlPFC itself, arguing that  
460 increases in activation in this area when focused on specific attributes (e.g. focusing on healthy  
461 eating) reflect computations necessary to redirect attention and alter weights. We thus interrogated  
462 the dlPFC for evidence that activation in this area during either Study 2 or Study 3 might increase  
463 generally when people focus on regulating their attention, as might be expected if this region  
464 implements changes in weights. However, we observed no effect of regulatory focus on overall  
465 response in this region in either Study 2 ( $F_{2,96} = 1.12, P = .33$ ) or Study 3 ( $F_{2,70} = 1.294, P = .28$ ).  
466 Thus, we found no evidence that this region activates to *drive* changes in weights.  
467

468 **Discussion**

469 When and why do normative choices (i.e., those choices that conform to abstract standards and  
470 social rules) recruit regions associated with cognitive control like the dorsolateral prefrontal cortex  
471 (dlPFC)? Simulated activity from an attribute-based neural drift diffusion model (anDDM)  
472 suggests a straightforward answer: normative behavior may only trigger the dlPFC when  
473 normative attributes conflict with hedonic ones, and the decision maker values hedonic attributes  
474 more. Across three separate fMRI studies and two different choice domains (generosity and  
475 healthy eating), we show several results that confirm predictions of the anDDM. First, we show  
476 that activation in the dlPFC correlates consistently with predicted activity of the anDDM across  
477 all contexts examined. Second, we show that even in individuals who show a natural bias towards  
478 selfishness, regulatory instructions to focus on socially normative attributes increase generosity  
479 but *reduce* dlPFC response when choosing generously. Third, this pattern replicated in the domain  
480 of healthy eating, suggesting a general principle that may apply across a variety of self-control  
481 dilemmas. Finally, we found little evidence that overall activation in the dlPFC predicted  
482 regulation-induced changes in weight. Our results provide empirical support for recent theories  
483 positing that successful self-control—defined as choosing long-term or abstract benefits over  
484 hedonic, immediate gratification<sup>25</sup>—depends importantly on value computations. They stand in  
485 contrast to the predictions of models of posterior dlPFC function suggesting that the strength with  
486 which the dlPFC activates during choice determines whether prepotent hedonistic responses are  
487 resisted<sup>19,21,24,26</sup>. Our results point to a modified conceptualization of the role played by the dlPFC  
488 in promoting normative choice.

489



490 A large literature, generally consistent with models that assume normative behavior requires  
491 controlled processing, suggests that the dlPFC activates when prepotent responses conflict with  
492 desired normative outcomes<sup>27,28</sup>. The neural activity of the anDDM, which arises from mutually  
493 inhibitory pools of option neurons receiving weighted inputs from hedonic and virtuous attributes,  
494 is in some ways consistent with such an interpretation. However, it calls into question assumptions  
495 that prepotency equates to hedonism, or even to automaticity<sup>29</sup> more generally. Instead, our model  
496 suggests that the “prepotent response” may correspond, at least in the realm of value-based  
497 decision making, to choices consistent with the choice attribute that is currently receiving higher  
498 weight, *regardless of the source of that weight*. In other words, even when higher weights on  
499 normative attributes derive primarily from a deliberative, regulatory focus, as in our final two  
500 studies<sup>23</sup>, this results in *reduced* activity in the dlPFC when making normative choices (and greater  
501 activity when choosing hedonistically). Mechanistically, these patterns result from the fact that  
502 higher weights on normative attributes reduce the computation required for competitive neural  
503 interactions to settle on the normative response. Thus, while virtuous choices associated with  
504 successful self-control may sometimes recruit the posterior dlPFC, manipulations that increase the  
505 weight on normative attributes, either by making it more salient in the exogenous environment or  
506 focusing endogenous attention towards it, should both promote normative behavior and make it  
507 easier to accomplish.

508

509 This observation may help to explain why some researchers have found evidence consistent with  
510 greater response in the dlPFC promoting normative choice<sup>1,3,6,9,30,31</sup>, while others have not<sup>10-12</sup>.  
511 Variations that influence the weight on normative attributes—whether across individuals, goal  
512 contexts, or paradigms—will tend to reduce statistical significance and increase heterogeneity in

513 the link between neural activation in the dlPFC and normative choice. Fortunately, our model  
514 provides a way to predict both *when* and *why* dlPFC activity will be observed. For example, in the  
515 domain of intertemporal choice, our model predicts that making future outcomes more salient  
516 should amplify their weight in the choice process, promoting patience while *decreasing* dlPFC  
517 activation. This is exactly what is observed empirically<sup>12</sup>. Thus, researchers would do well to  
518 interpret activation of the dlPFC for a particular kind of choice (be it generous or selfish, healthy  
519 or unhealthy, patient or impatient) with caution. Such a pattern may say less about whether the  
520 dlPFC (and by extension, cognitive control more generally) is *required* to inhibit instinctual  
521 responses and preferences, and more about what kinds of attributes are most salient or valuable in  
522 the moment.

523

524 Our results have important implications for theories of self-control suggesting that the dlPFC  
525 promotes self-control by modulating attribute weights in the choice process<sup>1,31,32</sup>. The region of  
526 dlPFC that we observe here correlating with the anDDM is nearly identical to areas observed when  
527 dieters made healthy compared to unhealthy choices<sup>1</sup>, and when participants are required to  
528 recompute values based on contextual information<sup>32</sup>. Yet we find that the relationship between  
529 self-control “success” and “failure” in this region reverses when participants actively focus on  
530 health: dlPFC now responds more strongly to *unhealthy* choices. These results thus seem  
531 incongruent with the notion that this area down-regulates weight on norm-inconsistent  
532 considerations and up-regulates norm-consistent ones, since we observed *decreased* responses in  
533 this area in the context of *increased* normative choice and *increased* weight on normative attributes  
534 (Figure 4, c.f. <sup>23</sup>). Moreover, we found no evidence that regulatory instructions led to greater  
535 overall activation in the dlPFC, as might be expected if this area implements changes in the weight

536 given to normative attributes. Instead, this region appeared to correlate with the evidence  
537 accumulation stage of decisions, rather than with the evidence construction stage, responding  
538 during decision conflict generally, regardless of whether that conflict derived from greater  
539 weighting of hedonic or normative attributes.

540  
541 We emphasize, however, that our results and conclusions apply narrowly to the area of dlPFC  
542 identified. The anDDM-related dlPFC region in this study lies posterior and dorsal to another  
543 dlPFC area that we have observed, in these same datasets, to track hedonistic and normative  
544 attributes in a goal-consistent manner and to serve as a candidate for mediating regulation-induced  
545 changes<sup>23</sup>. Furthermore, gray matter volume in this more anterior dlPFC area, but not in the  
546 posterior dlPFC region identified here, correlates with regulatory success<sup>33</sup>. Thus, while some  
547 areas of the dlPFC may indeed play an important role in promoting self-regulation and normative  
548 behavior by altering attribute weights in decision value, we suspect that they are anatomically and  
549 computationally distinct from the region of the posterior dlPFC sometimes assumed to serve this  
550 role. Future work will be needed to better delineate subregions of the dlPFC, and to determine the  
551 unique role each one plays in promoting normative choices.

552  
553 The close correspondence between predictions of the anDDM and activation patterns in the dlPFC  
554 makes it tempting to conclude that this region performs this computational function. While this  
555 hypothesis is consistent with results from single-cell recordings<sup>17,34</sup>, we also acknowledge that the  
556 dlPFC has been associated with many computational functions and roles, not all of which are  
557 mutually incompatible. Thus, it is possible that the dlPFC region observed here performs some  
558 sort of process that is correlated with, but not identical to, the neuronal computations of the anDDM.

559 Future work, including computational modifications or additions to the anDDM, as well as  
560 recordings from other modalities<sup>34</sup>, may help not only to elucidate the precise computational  
561 functions served by this area, but also the ways in which it promotes adaptive choice and normative  
562 behavior. Work extending these findings to other domains of normative choice, such as moral  
563 decision making or intertemporal choice, may also help to identify the commonalities and  
564 differences across different self-control dilemmas.

565

## 566 **Methods**

### 567 *Computational Model Simulations*

568 Our attribute-based neural drift diffusion model (anDDM: Figure 1) assumes that brain areas  
569 involved in decision making (particularly those that convert preferences into action) contain two  
570 spatially intermingled populations of neurons representing the options under consideration (here  
571 denoted as Option 1 and Option 2), with instantaneous firing rates ( $FR$ ) at time  $t$  of  $FR_1(t)$  and  
572  $FR_2(t)$ . At the beginning of the choice period  $FR_1(0) = FR_2(0) = 0$ . Firing rates in each population  
573 evolve dynamically from the onset of choice based on the sum total of excitatory and inhibitory  
574 inputs (detailed below). A choice results at time  $t'$ , the first moment at which the firing rate of one  
575 of the two populations exceeds a predetermined threshold or barrier  $B$ . The total response time RT  
576 is  $t'$  plus a constant non-decision time ( $ndt$ ) that accounts for perceptual and motor delays.

577

578 Firing rates in the two pools evolve noisily over time according to the following two equations:

$$579 \quad \begin{cases} FR_1(t) = \max(0, \gamma \times FR_1(t-1) - \zeta \times FR_2(t-1) + (v_1 - v_2) + \varepsilon_1(t)) \\ FR_2(t) = \max(0, \gamma \times FR_2(t-1) - \zeta \times FR_1(t-1) + (v_2 - v_1) + \varepsilon_2(t)) \end{cases}$$

580 where the noise terms  $\varepsilon_x(t)$  are normally distributed  $\sim N(0,1)$ ,  $\gamma \geq 1$  represents recurrent auto-  
581 stimulation from the pool onto itself,  $\zeta \geq 0$  represents inhibitory input from the other pool, and  $v_1$   
582 and  $v_2$  represent external inputs proportional to the overall values of Options 1 and 2, determined  
583 by the weighted sum of their choice-relevant attribute values:

$$584 \quad \begin{cases} v_1 = \sum_i w_i \text{Attrib}_i^1 \\ v_2 = \sum_i w_i \text{Attrib}_i^2 \end{cases}$$

585

586 Thus, each pool's activity receives an external input proportional to its value relative to the other  
587 option. In our simulations, we assumed two independent attributes: one related to hedonism (e.g.,  
588 tastiness of a food) and one related to norms and standards (e.g. healthiness), although in principle  
589 any number and type of attribute could occur. Using these equations allowed us to simulate the  
590 dynamically evolving balance of excitation and inhibition across the two neuronal populations,  
591 and to derive distributions of both response times (RTs) and neural response. We label the final  
592 output (i.e., choice) of the system as "normative" if it results in selecting the option with the higher  
593 unweighted value for the normative attribute (e.g., the option with higher healthiness).

594  
595 To simulate everyday self-control dilemmas using this framework, we simulated choices between  
596 two options representing different combinations of hedonistic and normative attributes, allowing  
597 the relative value difference between an option and its alternative on a given attribute to vary  
598 independently in the arbitrarily chosen range [-3, -2, ... +2, +3]. This permitted us to explore how  
599 the likelihood of a normative choice changes depending on how much better or worse one of the  
600 two options is along hedonic and normative attribute dimensions, as well as what happens when  
601 the relative values of the two attributes conflict (i.e. take opposite signs) or do not.

602  
603 We also sought to capture in our simulations the notion that a decision maker can vary from  
604 moment to moment in their commitment to and desire for hedonistic vs. normative goals. For  
605 example, a dieter may begin to relax the importance they place on norm-consistent attributes like  
606 healthiness once they reach their target weight, resulting in more unhealthy choices. In the main  
607 text (and Figure 2), we focus on simulations for two different goal contexts: one with a higher  
608 weight on tastiness, a hedonic attribute (i.e.,  $w_T = .05$ ,  $w_H = .02$ ) and one with a higher weight on

609 healthiness, a normative attribute ( $w_T = .02$ ,  $w_H = .05$ ). For simplicity, we assumed that all choices  
610 used a choice-determining threshold  $B=0.15$ , selected to produce RTs in the range typically  
611 observed in human subjects. Thus, for purposes of illustration, we simulated a decision-maker in  
612 two different contexts with different weights on the two attributes, facing 49 distinct choices  
613 representing different combinations of attribute values. To ensure that our conclusions held across  
614 a variety of weights, we also simulated an additional 34 different goal contexts, fully covering the  
615 factorial combination of weights on  $w_T$  and  $w_H$  in the range of 0, .01, .02 ... .05. Using these values  
616 and weights, we simulated choice frequencies, total neural activation (summed across the two  
617 neuronal pools), and RTs for each of the different hypothetical option pairs/attribute combinations,  
618 probing the effects of attribute weights, attribute magnitudes, and attribute conflict (i.e. match or  
619 mismatch between the signs of normative and hedonic attribute). Results of these simulations are  
620 displayed in Figure 2. Code is available at [link released after publication].

621

## 622 *Experimental Studies*

623 Details about portions of Studies 1, 2 and 3, as well as neuroimaging parameters, have been  
624 reported previously<sup>22,23</sup>. Here, we highlight in brief the most important details for the current work.

625

626 *Participants.* For Study 1, we analyzed data from 51 male volunteers (mean age 22, range 18-35).  
627 All participants received a show-up fee of \$30 as well as an additional amount ranging from \$0-  
628 \$100, depending on the outcome of the task (see below). For Study 2, we analyzed data from 49  
629 volunteers (26 male, mean age 28, range 19-40). For Study 3, 36 individuals from Study 2 returned  
630 to the lab for a separate session on a separate day to complete a dietary choice task. For each  
631 session in Studies 2 and 3, participants received a show-up fee of \$50. Participants completing the

632 altruistic choice task in Study 2 also received from \$0-\$40 in additional earnings, depending on  
633 the outcome of the task (see below). Caltech's Internal Review Board approved all procedures.  
634 Participants in all studies provided informed consent prior to participation.

635

### 636 *Tasks and Stimuli*

637 *Altruistic Choice Task (Studies 1 & 2)*. We examined self-control dilemmas pitting self-interest  
638 against generosity using an Altruistic Choice Task for Studies 1 and 2. On every trial in the scanner,  
639 the participant chose between a proposed pair of monetary prizes to herself and a real but  
640 anonymous partner, or a constant default prize-pair to both (\$50 in Study 1, \$20 in Study 2) (Figure  
641 3a-b). Proposed prizes in the prize-pair varied from \$0 to \$100 in Study 1 and \$0 to \$40 in Study  
642 2, and always involved one individual receiving an amount less than or equal to the default, while  
643 the other individual received more. Thus, on every trial the participant had to choose between  
644 generous behavior (benefitting the other at a cost to oneself) and selfish behavior (benefitting  
645 oneself at a cost to the other).

646

647 Upon presentation of the proposal, participants had up to four seconds to indicate their choice  
648 using a 4-point scale (Strong No, No, Yes, Strong Yes), allowing us to simultaneously measure  
649 both their decision and strength of preference at the time of choice. The direction of increasing  
650 preference (right-to-left or left-to-right) varied for each round of the task in Study 1, and across  
651 participants in Study 2. If the subject did not respond within four seconds, both individuals  
652 received \$0 for that trial.

653



654 To increase the anonymity of choices, the participant's choice was implemented probabilistically:  
655 in 60% of trials he received his chosen option, while in 40% of trials his choice was reversed and  
656 he received the alternative, non-chosen option. This reversal meant that while it was always in the  
657 participant's best interest to choose according to her true preferences, her partner could never be  
658 sure about the actual choice made. Probabilistic implementation does not strongly influence the  
659 choices participants make<sup>22,23</sup>, but permits more plausible anonymity, increasing the self-control  
660 challenge involved in choosing generously. The participants were informed that the passive  
661 partners were aware of the probabilistic implementation, and the outcome was revealed on every  
662 trial 2-4 seconds following the response.

663  
664 Study 1 included 180 trials total, with no specific instructions for how to respond. Study 2 included  
665 270 trials, 90 each in three instructed focus conditions. See the *Manipulating Normative Goals*  
666 (*Studies 2 & 3*) section below for details on these instructions.

667  
668 *Dietary Choice Task (Study 3)*. We examined self-control dilemmas in a second context pitting  
669 hedonism against healthy eating using a Dietary Choice Task for Study 3. Prior to the task,  
670 participants rated a set of 200 different foods for their healthiness and tastiness. These ratings were  
671 used to 1) select a pool of 90 foods that covered a range of health and taste ratings and 2) select a  
672 neutral reference food rated as neutral on both health and taste.

673  
674 On each of 270 trials in the scanner, participants saw one of the 90 different pre-selected foods  
675 (Figure 3c), and had to decide whether they would prefer to eat the displayed food or the reference  
676 food. As in the altruistic choice task, participants had up to four seconds to indicate their choice

677 using a 4-point scale (Strong No, No, Yes, Strong Yes). If the subject did not respond within four  
678 seconds, one of the foods was selected randomly. To match the instructed attention manipulation  
679 used in the Altruistic Choice Task, participants completed 90 trials each in one of three instructed  
680 focus conditions. See the *Manipulating Normative Goals (Studies 2 & 3)* section below for details.

681  
682 To match the probabilistic outcome used in the altruistic choice task, the participant's choice was  
683 also implemented probabilistically in the Food Choice Task. In 60% of trials he received his chosen  
684 option, while in 40% of trials his choice was reversed and he received the alternative, non-chosen  
685 option. To reduce the length of the task, participants did not see this outcome on every trial. Instead,  
686 three trials were selected randomly at the end of each scan, and participants viewed their choice as  
687 well as the probabilistic outcome on that trial.

688

689 *Manipulating Normative Goals (Studies 2 & 3)*

690 Our computational model simulations suggested that the extent to which normative choices are  
691 associated with greater neural response depends to a large extent on the priority or weight given  
692 to normative vs. hedonic attributes. We thus capitalized on the design of Studies 2 and 3, which  
693 manipulated attention to different attributes (and corresponding weights), allowing us to test  
694 specific predictions of the anDDM.

695

696 *Generosity Manipulation (Study 2)*. To manipulate attention to different attributes, during the  
697 Altruistic Choice Task in Study 2, participants completed trials in one of three different instructed  
698 focus conditions: Respond Naturally, Focus on Ethics, and Focus on Partner. During *Natural* trials,  
699 participants were told to allow whatever feelings and thoughts came most naturally to mind, and

700 to just choose according to their preferences on that trial. During *Ethics* trials, participants were  
701 asked to focus on doing the right thing during their choices. They were encouraged to think about  
702 the justice of their choice, as well as its ethical or moral implications, and to try to bring their  
703 actions in line with these considerations. During *Partner* trials, participants were asked to focus  
704 on their partner's feelings during their choices. They were encouraged to think about how the other  
705 person would be affected, as well as whether they would be happy with the choice, and to bring  
706 their actions in line with these considerations.

707

708 Each participant completed 90 trials per condition, presented in randomly interleaved blocks of  
709 ten trials. A detailed set of instructions informing participants of their task for the upcoming block  
710 of trials was presented for 4 seconds prior to the block, and participants were asked to focus on the  
711 specific instruction for all trials within that block.

712

713 *Healthiness Manipulation (Study 3)*. Analogous to the Altruistic Choice Task in Study 2, we  
714 manipulated healthy eating in Study 3 using an instructed focus manipulation. Each participant  
715 completed 270 choice trials, 90 each in one of three attentional conditions: *Natural Focus*, *Taste*  
716 *Focus*, or *Health Focus*. During *Natural* trials, participants were told to allow whatever feelings  
717 and thoughts came most naturally to mind, and to just choose according to their preferences on  
718 that trial. During *Taste* trials, participants were asked to focus on how tasty each food was, and to  
719 try to bring their actions in line with this consideration. During *Health* trials, participants were  
720 asked to focus on the health implications of their choice. As in the Altruistic Choice Task,  
721 attentional instructions were given prior to each block of 10 trials, and participants were asked to  
722 focus on the specific instruction given for all trials within a block. However, participants knew

723 that they would receive the outcome of one of their choices, and were told that they should choose  
724 according to their preferences regardless of the instruction, thus encouraging participants to choose  
725 in a way that reflected their current decision value for the item.

726

### 727 *Defining Normative Choice*

728 *Behavioral definition of generosity.* All choices involved a tradeoff between maximizing outcomes  
729 for the self or for the other. We therefore label specific decisions as normative (i.e., generous) if  
730 the participant accepted a proposal when  $\$Self < \$Other$ , or rejected one when  $\$Self > \$Other$ .  
731 Choices were labeled as hedonistic (i.e., selfish) otherwise.

732

733 *Behavioral definition of healthy choice.* In the Dietary Choice Task, we separately examined trials  
734 requiring a tradeoff between taste and health (i.e. conflict trials where a food was rated either as  
735 healthy but not tasty, or as unhealthy but tasty) as well as trials with no tradeoff (i.e., no-conflict  
736 trials where a food was both tasty and healthy, or both unhealthy and not tasty). In both cases, we  
737 label specific decisions as normative (i.e., healthy) if the participant either accepted a healthy food,  
738 or rejected an unhealthy food. All other choices were labeled as hedonistic (i.e., unhealthy).

739

740

### 741 *Computational Model Fitting*

742 We used a Bayesian model-fitting approach to identify best-fitting model parameters of the  
743 anDDM (i.e. attribute weight parameters, threshold  $B$ , non-decision time  $ndt$ , auto-excitation  
744 parameter  $\gamma$  and lateral inhibition parameter  $\zeta$ ) to account for choices and RTs, separately for each  
745 participant in each study and (in Studies 2 and 3) each condition. More specifically, we obtained

746 estimates of the posterior distribution of each parameter using the Differentially-Evolving Monte-  
747 Carlo Markov Chain (DEMCMC) sampling method and MATLAB<sup>35</sup> code developed by <sup>36</sup>. This  
748 method uses the anDDM described above (Computational Model Simulations) to simulate the  
749 likelihood of the observed data (i.e. choices and RTs) given a specific combination of parameters,  
750 and then uses this likelihood to construct a Bayesian estimate of the posterior distribution of the  
751 likelihood of the parameters given the data.

752

753 For each individual fit, we used  $3 \times N$  chains, where  $N$  is the number of free parameters (7 in  
754 Studies 1 and 2, 6 in Study 3), using uninformative priors and constraining parameter values as  
755 shown in Supplementary Table S1 based on previous work<sup>22,23</sup> and theoretical bounds. To  
756 construct the estimated posterior distributions of each parameter, we sampled 1500 iterations per  
757 chain after an initial burn-in period of 500 samples. Best-fitting values of each parameter were  
758 computed as the mean over the posterior distribution for that parameter. These parameter values  
759 (see Supplementary Table S1) were used to simulate trial-by-trial activation across the two  
760 neuronal pools for use in the GLMs described below. Importantly, parameter values identified by  
761 this fitting procedure suggested that the model provided a good fit to behavior across all three  
762 studies (Supplementary Figure 2).

763

764 *Neuroimaging Analyses*

765

766 *GLM 1a: Correlates of the anDDM (Study 1).* We used GLM 1a to identify brain regions where  
767 activation varied parametrically according to the predictions of the anDDM in Study 1 (Altruistic  
768 Choice Task). To this end, we determined that the best BOLD approximation of the anDDM was

769 a parametric modulator with a value consisting of the sum total of the simulated response across  
770 both pools of neurons, averaged over all simulations terminating in the observed choice on that  
771 trial within  $\pm 250$ ms of the observed RT, and modulating a boxcar function with onset at the  
772 beginning of the choice period and having a duration of the RT on that trial (see Supplemental  
773 Methods for further detail on selecting the best regressor). To simulate expected anDDM activation  
774 on each trial, we generated 5000 simulations using the best-fitting parameters for each participant  
775 and the estimated value of the proposal and default on each trial (i.e.,  $w_{\text{Self}} * \$\text{Self} + w_{\text{Other}} * \$\text{Other}$   
776  $+ w_{\text{Fairness}} * | \$\text{Self} - \$\text{Other} |$ ).

777  
778 Then, for each subject we estimated a GLM with AR(1) and the following regressors of interest:  
779 R1) A boxcar function for the choice period on all trials (duration = RT on that trial). R2) R1  
780 modulated by the subject's stated preference on that trial (1 = Strong No, 4 = Strong Yes). R3) R1  
781 modulated by the estimated activation of the anDDM on that trial. R4) A boxcar function of 3  
782 seconds specifying the outcome period on each trial. R5) R4 modulated by the outcome for the  
783 self on each trial. R6) R4 modulated by the outcome for the partner on each trial. R7) A boxcar  
784 function (duration = 4 seconds) specifying missed trials. Parametric modulators were  
785 orthogonalized to each other in SPM. Regressors of non-interest included six motion regressors as  
786 well as session constants.

787  
788 We then computed subject-level contrasts of the anDDM parametric modulator (R3) against an  
789 implicit baseline. Finally, to test the hypothesis that anDDM responses might correlate with  
790 activation in the dlPFC, we subjected this contrast to a one-sample t-test against zero, thresholded  
791 at a voxel-wise  $P < .001$ , and a cluster-defining threshold of  $P < .05$ , small-volume corrected within

792 a 10-mm spherical region of interest (ROI) centered on the peak coordinates of activity for the  
793 contrast of normative (healthy) vs. hedonistic (unhealthy) choice in a previous study of self-control  
794 in dieters<sup>1</sup>. In addition to this ROI-analysis, we performed supplemental analyses at the whole-  
795 brain level at a voxel-level threshold of  $P < .001$  uncorrected and a whole-brain cluster-corrected  
796 level of  $P < .05$ .

797  
798 *GLM 1b: Correlates of the anDDM (Study 2)*. GLM1b was similar to GLM1a, with the exception  
799 that we estimated regressors for each condition separately. R1, R4, and R7 were boxcar functions  
800 representing the choice period for the *Natural*, *Ethics*, and *Partner* conditions, respectively. R2,  
801 R5, and R9 modulated R1, R4 and R7 with the decision value on that trial. R3, R6, and R9  
802 modulated R1, R4, and R7 using the estimated activation of the anDDM on that trial. A single  
803 contrast representing neural correlates of the anDDM was constructed by combining R3, R6 and  
804 R9 at the subject-level and performing a one-sample t-test against zero, thresholded at a voxel-  
805 wise  $P < .001$  and a small-volume cluster-corrected level of  $P < .05$  within the dlPFC ROI  
806 described above.

807  
808 *GLM1c: Correlates of the anDDM (Study 3)*. GLM1c was similar to GLM1b, but applied to the  
809 Food Choice Task. R1, R4, and R7 were boxcar functions representing *Natural*, *Taste*, and *Health*  
810 focus conditions. R2, R5, and R8 were parametric modulators representing the decision value on  
811 that trial, and R3, R6, and R9 were modulators consisting of anDDM activity simulated using  
812 healthiness and tastiness ratings as attributes. Similar to Studies 1 and 2, correlates of the anDDM  
813 were identified in this study thresholded at a voxel-wise  $P < .001$  and a small-volume cluster-  
814 corrected level of  $P < .05$  within the dlPFC ROI described above.

815

816 *Data-driven ROI definition.* Based on GLMs 1a, b and c, we identified a region of the left dlPFC

817 consistently associated with the anDDM across all three studies through a three-way conjunction

818 analysis using the imcalc function in SPM12, with each individual study map thresholded at  $P$

819  $< .05$ , small-volume corrected, and a minimum overlap of  $> 5$  contiguous voxels. Outside of this

820 ROI, we also identified regions significant across all three studies at  $P < .05$ , whole-brain corrected.

821 This identified just three regions, located in the left dlPFC, left IFG, and dACC (Figure 4 and

822 Supplemental Figures S3 and S4). We then interrogated activation within these regions specifically

823 for the contrast of normative vs. hedonistic choice, using GLMs 2a, b and c, as specified below.

824

825 *GLM 2a: Generous vs. Selfish decisions in Altruistic Choice (Study 1).* We used GLM 2a to test

826 predictions about activation on trials in which subjects chose generously or selfishly. The analysis

827 was carried out in three steps.

828

829 First, for each subject we estimated a GLM with AR(1) and the following regressors of interest:

830 R1) A boxcar function for the choice period on trials when the subject chose selfishly. R2) R1

831 modulated by the value of 4-point preference response (i.e., Strong No to Strong Yes) at the time

832 of choice. R3) A boxcar function for the choice period on trials when the subject chose generously.

833 R4) R3 modulated by behavioral preference. Regressors of non-interest included six motion

834 regressors as well as session constants.

835

836 Second, we computed the subject-level contrast image [R3 – R1], which identified regions with

837 differential response for generous compared to selfish choices. Seven subjects were excluded from



838 this analysis for having fewer than 4 generous choices over the 180 trials. We computed the  
839 average value of this contrast within the three anDDM ROIs specified above. As a supplementary  
840 analysis, we also asked whether any voxels beyond these regions demonstrated a significant effect,  
841 using a whole-brain analysis thresholded at  $P < .001$ , uncorrected (see Supplementary Table S3).

842

843 *GLM 2b: Generous vs. Selfish decisions in Altruistic Choice (Study 2)*. We used GLM 2b to test  
844 predictions about activation on trials in which the subject chose generously or selfishly in Study 2,  
845 and to compare how instructed attention altered these responses. All unreported details are as in  
846 GLM1a. Regressors of interest consisted of the following: R1) A boxcar function for the choice  
847 period on trials when the subject chose selfishly in *Natural Focus* trials. R2) R1 modulated by the  
848 value of 4-point preference response (i.e., Strong No to Strong Yes) expressed at the time of choice.  
849 R3) A boxcar function for the choice period on trials when the subject chose generously in *Natural*  
850 *Focus* trials. R4) R3 modulated by behavioral preference. R5-R8) Analogous regressors for  
851 generous and selfish choices during *Ethics Focus* trials. R9-12) Analogous regressors for generous  
852 and selfish choices during *Partner Focus* trials. R13-15) A boxcar function of 3 sec duration  
853 signaling the outcome period for *Natural*, *Ethics*, or *Partner Focus* trials. R16-18) R13-15  
854 modulated by the amount received by the subject at outcome. R19-21) R13-15 modulated by the  
855 amount received by the partner at outcome.

856

857 We then computed the subject-level contrast images [R3 – R1], [R7 – R5], and [R11 – R9], which  
858 identified regions with differential response for generous compared to selfish choices in each  
859 condition. We computed the average value of each of these contrasts within the three anDDM  
860 ROIs specified above. As a supplementary analysis, we also asked whether any voxels beyond

861 these regions demonstrated a significant effect in any condition, using a whole-brain analysis  
862 thresholded at  $P < .001$ , uncorrected (see Supplementary Table S3).

863

864 *GLM 2c: Healthy vs. Unhealthy decisions in the Food Choice Task (Study 3)*. GLM 2c was  
865 analogous to GLM 2b, but examined healthy vs. unhealthy choices in the Dietary Choice Task,  
866 separately for conflicted trials (i.e. healthy but not tasty foods and tasty but unhealthy foods) and  
867 for unconflicted trials (i.e. healthy and tasty foods or unhealthy and not tasty foods). It included  
868 the following regressors of interest: R1) A boxcar function for the choice period on conflicted  
869 trials when the subject made a healthy choice (i.e., accepted a healthy-but-not-tasty or rejected a  
870 tasty-but-unhealthy food) in *Natural Focus* trials. R2) R1 modulated by the value of behaviorally  
871 expressed preference at the time of choice. R3) A boxcar function for the choice period on  
872 conflicted trials when the subject made an unhealthy choice in *Natural* trials. R4) R3 modulated  
873 by behavioral preference. R5-8) Analogous regressors for healthy and unhealthy choices during  
874 conflicted *Taste Focus* trials. R9-12) Analogous regressors for healthy and unhealthy choices  
875 during *Health Focus* trials. R13) Healthy choices on unconflicted *Natural Focus* trials. R14)  
876 Unhealthy choices on unconflicted *Natural Focus* trials. R15-16) R13 and R14 modulated by  
877 preference. R17-R20) Analogous regressors for healthy and unhealthy choice on unconflicted  
878 trials in the *Health Focus* trials. R21-R24) Analogous regressors for healthy and unhealthy choice  
879 on unconflicted trials in the *Taste Focus* trials. Subject-level contrast images of healthy vs.  
880 unhealthy choices, in each condition separately and separately for conflicted vs. unconflicted trials,  
881 were computed in a manner identical to GLM2b. We analyzed activation for these contrasts  
882 specifically within the three ROIs identified as anDDM regions. As a supplementary analysis, we

883 also report results at the whole-brain level at  $P < .001$ , uncorrected, in Table S3. Unreported details

884 are as in GLM 2a.

885

886

887 **Data Availability.** Behavioral data and all analysis code are available on the Open Science

888 Framework at [link released after acceptance for publication]. Neuroimaging data are available

889 upon request to the authors.

890

891

892 **References**

- 893
- 894 1. Hare, T.A., Camerer, C.F. & Rangel, A. Self-control in decision-making involves  
895 modulation of the vmPFC valuation system. *Science* **324**, 646-648 (2009).
- 896 2. Strombach, T., *et al.* Social discounting involves modulation of neural value signals by  
897 temporoparietal junction. *Proc. Natl. Acad. Sci. USA* **112**, 1619-1624 (2015).
- 898 3. Cutler, J. & Campbell-Meiklejohn, D. A comparative fMRI meta-analysis of altruistic and  
899 strategic decisions to give. *NeuroImage* **184**, 227-241 (2019).
- 900 4. Luo, S., Ainslie, G., Pollini, D., Giragosian, L. & Monterosso, J.R. Moderators of the  
901 association between brain activation and farsighted choice. *J. Neurosci.*, **59**, 1469-1477  
902 (2012).
- 903 5. McClure, S.M., Laibson, D.I., Loewenstein, G. & Cohen, J.D. Separate neural systems  
904 value immediate and delayed monetary rewards. *Science* **306**, 503-507 (2004).
- 905 6. Hare, T.A., Malmaud, J. & Rangel, A. Focusing attention on the health aspects of foods  
906 changes value signals in vmPFC and improves dietary choice. *J Neurosci* **31**, 11077-11087  
907 (2011).
- 908 7. Kober, H., *et al.* Prefrontal–striatal pathway underlies cognitive regulation of craving. *Proc.*  
909 *Natl. Acad. Sci., USA* **107**, 14811-14816 (2010).
- 910 8. Figner, B., *et al.* Lateral prefrontal cortex and self-control in intertemporal choice. *Nat.*  
911 *Neuroscie.* **13**, 538-539 (2010).
- 912 9. Ruff, C.C., Ugazio, G. & Fehr, E. Changing social norm compliance with noninvasive  
913 brain stimulation. *Science* **342**, 482-484 (2013).
- 914 10. Zaki, J. & Mitchell, J.P. Equitable decision making is associated with neural markers of  
915 intrinsic value. *Proc. Natl. Acad. Sci. USA* **108**, 19761-19766 (2011).

- 916 11. Tusche, A., Böckler, A., Kanske, P., Trautwein, F.-M. & Singer, T. Decoding the charitable  
917 brain: empathy, perspective taking, and attention shifts differentially predict altruistic  
918 giving. *J. Neurosci.* **36**, 4719-4732 (2016).
- 919 12. Magen, E., Kim, B., Dweck, C.S., Gross, J.J. & McClure, S.M. Behavioral and neural  
920 correlates of increased self-control in the absence of increased willpower. *Proc. Natl. Acad.*  
921 *Sci. USA* **111**, 9786-9791 (2014).
- 922 13. Camus, M., *et al.* Repetitive transcranial magnetic stimulation over the right dorsolateral  
923 prefrontal cortex decreases valuations during food choices. *Eur. J. Neurosci.* **30**, 1980-  
924 1988 (2009).
- 925 14. Heekeren, H., Marrett, S., Bandettini, P. & Ungerleider, L. A general mechanism for  
926 perceptual decision-making in the human brain. *Nature* **431**, 859-862 (2004).
- 927 15. Noppeney, U., Ostwald, D. & Werner, S. Perceptual decisions formed by accumulation of  
928 audiovisual evidence in prefrontal cortex. *J. Neurosci.* **30**, 7434-7446 (2010).
- 929 16. Pedersen, M.L., Endestad, T. & Biele, G. Evidence accumulation and choice maintenance  
930 are dissociated in human perceptual decision making. *PloS One* **10**, e0140361 (2015).
- 931 17. Hanks, T.D., *et al.* Distinct relationships of parietal and prefrontal cortices to evidence  
932 accumulation. *Nature* **520**, 220-223 (2015).
- 933 18. Hare, T.A., Schultz, W., Camerer, C.F., O'Doherty, J.P. & Rangel, A. Transformation of  
934 stimulus value signals into motor commands during simple choice. *Proc. Natl. Acad. Sci.*  
935 *USA* **108**, 18120-18125 (2011).
- 936 19. Lopez, R.B., Hofmann, W., Wagner, D.D., Kelley, W.M. & Heatherton, T.F. Neural  
937 predictors of giving in to temptation in daily life. *Psychol. Sci.* **25**, 1337-1344 (2014).

- 938 20. Heatherton, T.F. & Wagner, D.D. Cognitive neuroscience of self-regulation failure. *Trends*  
939 *Cog. Sci.* **15**, 132-139 (2011).
- 940 21. Kelley, W.M., Wagner, D.D. & Heatherton, T.F. In search of a human self-regulation  
941 system. *Ann. Rev. Neuro.* **38**, 389-411 (2015).
- 942 22. Hutcherson, C.A., Bushong, B. & Rangel, A. A neurocomputational model of altruistic  
943 choice and its implications. *Neuron* **87**, 451-462 (2015).
- 944 23. Tusche, A. & Hutcherson, C.A. Cognitive regulation alters social and dietary choice by  
945 changing both domain-general and domain-specific attribute representations. *eLife* **7**,  
946 e31185 (2018).
- 947 24. Wagner, D.D., Altman, M., Boswell, R.G., Kelley, W.M. & Heatherton, T.F. Self-  
948 regulatory depletion enhances neural responses to rewards and impairs top-down control.  
949 *Psychol. Sci.* **24**, 2262-2271 (2013).
- 950 25. Duckworth, A.L. The significance of self-control. *Proc. Natl. Acad. Sci. USA* **108**, 2639-  
951 2640 (2011).
- 952 26. Hofmann, W., Friese, M. & Strack, F. Impulse and self-control from a dual-systems  
953 perspective. *Persp. Psychol. Sci.* **4**, 162-176 (2009).
- 954 27. Aron, A.R., Robbins, T.W. & Poldrack, R.A. Inhibition and the right inferior frontal cortex.  
955 *Trends Cog. Sci.* **8**, 170-177 (2004).
- 956 28. Garavan, H., Ross, T.J. & Stein, E.A. Right hemispheric dominance of inhibitory control:  
957 an event-related functional MRI study. *Proc. Natl. Acad. Sci. USA* **96**, 8301-8306 (1999).
- 958 29. Bargh, J.A. The four horsemen of automaticity: Awareness, intention, efficiency, and  
959 control in social cognition. in *Handbook of social cognition*, Vol. 1 (eds. Wyer, R.A. &  
960 Srull, T.K.) 1-40 (Psychology Press, New York, NY, 1994).

- 961 30. Hakimi, S. & Hare, T.A. Enhanced Neural Responses to Imagined Primary Rewards  
962 Predict Reduced Monetary Temporal Discounting. *J. Neurosci.* **35**, 13103-13109 (2015).
- 963 31. Baumgartner, T., Knoch, D., Hotz, P., Eisenegger, C. & Fehr, E. Dorsolateral and  
964 ventromedial prefrontal cortex orchestrate normative choice. *Nat. Neurosci.* **14**, 1468-1474  
965 (2011).
- 966 32. Rudolf, S. & Hare, T.A. Interactions between dorsolateral and ventromedial prefrontal  
967 cortex underlie context-dependent stimulus valuation in goal-directed choice. *J. Neurosci.*  
968 **34**, 15988-15996 (2014).
- 969 33. Schmidt, L., *et al.* Neuroanatomy of the vmPFC and dlPFC predicts individual differences  
970 in cognitive regulation during dietary self-control across regulation strategies. *J. Neurosci.*  
971 **38**, 5799-5806 (2018).
- 972 34. Hunt, L.T., *et al.* Triple dissociation of attention and decision computations across  
973 prefrontal cortex. *Nat. Neurosci.* **21**, 1471-1481 (2018).
- 974 35. MATLAB. (Natick, MA: The Mathworks, Inc., 2016b).
- 975 36. Holmes, W.R. & Trueblood, J.S. Bayesian analysis of the piecewise diffusion decision  
976 model. *Behav. Res. Methods* **50**, 730-743 (2018).

977

## 978 **Acknowledgments**

979 These studies were made possibly by grants from the Gordon and Betty Moore Foundation, the  
980 Lipper Foundation, and a National Institute of Mental Health Silvio O. Conte award (NIMH Conte  
981 Center 2P50 MH094258). The scientific results and conclusions reflect the authors' opinions and  
982 not the views of the granting entities. We gratefully acknowledge Antonio Rangel for comments  
983 on earlier versions of this manuscript.

984

985 **Author Contributions**

986 All authors contributed to the design of the studies. C.H. and A.T. collected the data, and C.H.

987 analyzed the data and developed the computational model. C.H., and A.T. wrote the paper.

988 **Competing Interests**

989 The authors declare no competing interests.

990



991 **Supplementary Materials**

992

993 **Supplementary Methods**

994 *Choosing the appropriate fMRI regressor for the anDDM model (GLMs 1a, b and c)*

995 The attribute-based neural drift diffusion model (anDDM) produces a dynamic accumulation  
996 signal that builds over hundreds of milliseconds. This raises a question about the appropriate way  
997 to model this signal in the hemodynamic response, which evolves more slowly over 5-10  
998 seconds. To determine the appropriate regressor for GLMs 1a, b, and c, we simulated 5000  
999 instantiations of the anDDM for every subject and trial in Study 2, using a time step of 5 ms. For  
1000 each subject, we then averaged the 5000 simulations at each time point to produce a single time  
1001 course of total activity across the two neuronal pools for a given set of trials. We convolved this  
1002 simulated time course with the canonical form of the hemodynamic response function (HRF) to  
1003 construct an expected BOLD time series given the inputs. We refer to this as the *ideal BOLD*.  
1004 We then compared the shape of the ideal BOLD to two different possible instantiations within a  
1005 traditional GLM analysis in SPM. Version 1 consisted of a parametric modulator of a stick  
1006 function placed at the onset of the trial, consisting of the sum total activity in the anDDM for  
1007 each trial,  $\sum_{t=1}^{RT} FR_1(t) + FR_2(t)$ . Version 2 consisted of a parametric modulator identical to  
1008 Version 1, but modulating a boxcar function placed at the onset of the trial with duration equal to  
1009 RT for that trial. Each of these regressors was convolved with the canonical form of the HRF and  
1010 correlated with the ideal time series to determine the one providing the closest match.  
1011 Results suggested that version 2 provided a closer match (Pearson's  $r$  ranging from .90-.99,  
1012 average = .96) compared to version 1 (Pearson's  $r$  ranging from .62-.94, average = .82). Note  
1013 also that the inclusion of the unmodulated boxcar function with duration equal to the RT on each

1014 trial controls for non-specific activation related to response times that does not build over time in  
1015 the manner expected based on the anDDM.

1016

## 1017 **Supplementary Results**

1018 In the main paper, we focus on the effects of normative vs. hedonistic choice within the dlPFC  
1019 ROI defined by the conjunction of anDDM-correlated trial-by-trial activity across all three  
1020 studies. However, in addition to this dlPFC ROI, we identified two other regions, in the dorsal  
1021 anterior cingulate cortex (dACC, see Figure S3) and left inferior frontal gyrus (IFG)/anterior  
1022 insula (IFG/aIns, see Figure S4) whose activity correlated with the anDDM across all three  
1023 studies ( $P < .001$ , whole brain corrected within each study). Here, we report analogous results on  
1024 measures of BOLD response in these regions during normative vs. hedonistic choice, for the sake  
1025 of completeness. These results suggest that our results are a general principle of areas correlating  
1026 with anDDM response.

### 1027 *dACC response during normative vs. hedonistic choices in Studies 1, 2, and 3*

1028 We began by examining whether activity in the dACC correlated with the contrast of normative  
1029 (generous) vs. hedonistic (selfish) choices in Study 1. As expected, and similar to the dlPFC, this  
1030 region showed a significantly greater response during generous compared to selfish choices  
1031 (paired  $t_{43} = 3.4825$ ,  $P = .001$ , Figure S3d). Similarly, in Study 2, we observed a significant  
1032 effect of normative goals on the difference in response between normative and hedonistic  
1033 choices ( $F_{2,96} = 13.67$ ,  $P = 5.97 \times 10^{-6}$ ). Follow-up t-tests confirmed that this was driven by a  
1034 stronger response in the dACC to normative (generous) choices in Natural trials (paired- $t_{43} =$   
1035  $3.53$ ,  $P = .0009$ ) as well as significantly stronger response to *hedonistic* choices (paired- $t_{43} =$   
1036  $2.41$ ,  $P = .02$ ) during Partner-focused trials. Finally, we replicated a similar pattern of effects in

1037 Study 3, showing a significant influence of normative (i.e., health-focused) goals on the contrast  
1038 of normative vs. hedonistic choices ( $F_{2,96} = 3.64$ ,  $P = .03$ ), which was driven by a stronger  
1039 response on normative (healthy) choices in the Natural and Taste conditions, and a marginally  
1040 stronger response on *hedonistic* (i.e., unhealthy) choices during Health Focus trials (paired- $t_{43} =$   
1041  $1.96$ ,  $P = .058$ ).

1042

1043 *IFG/aIns response during normative vs. hedonistic choices in Studies 1, 2, and 3*

1044 As expected if IFG/aIns response correlates with the anDDM, we observed similar patterns of  
1045 responding on normative vs. hedonistic choices across all three studies within this region.  
1046 IFG/aIns showed a significantly greater response during generous compared to selfish choices  
1047 (paired  $t_{43} = 3.22$ ,  $P = .002$ , Figure S4d). Similarly, in Study 2, we observed a significant effect  
1048 of normative goals on the difference in response between normative and hedonistic choices ( $F_{2,96}$   
1049  $= 17.66$ ,  $P = 2.93 \times 10^{-7}$ , Figure S4e). Follow-up t-tests confirmed that this was driven by a  
1050 stronger response in the dACC to normative (generous) choices in Natural trials (paired- $t_{43} =$   
1051  $5.06$ ,  $P = 6.57 \times 10^{-6}$ ) as well as significantly stronger response to *hedonistic* (i.e., selfish) choices  
1052 (paired- $t_{32} = 2.66$ ,  $P = .01$ ) during Partner-focused trials. Finally, we replicated a similar though  
1053 non-significant pattern of the effects of normative goals in Study 3 ( $F_{2,96} = .75$ ,  $P = .39$ , Figure  
1054 S4f). However, planned post-hoc comparisons confirmed that activation in the left IFG/aIns was  
1055 stronger on normative (healthy) choices in the Natural condition (paired- $t_{43} = 2.65$ ,  $P = .01$ ),  
1056 while activation for this same condition was non-significantly reversed on Health Focus trials ( $P$   
1057  $= .66$ ). The direct comparison of normative vs. hedonistic choices during Natural vs. Health  
1058 Focus was also significant (paired- $t_{34} = 2.18$ ,  $P = .04$ ).

1059

1060 **Supplementary Figures**

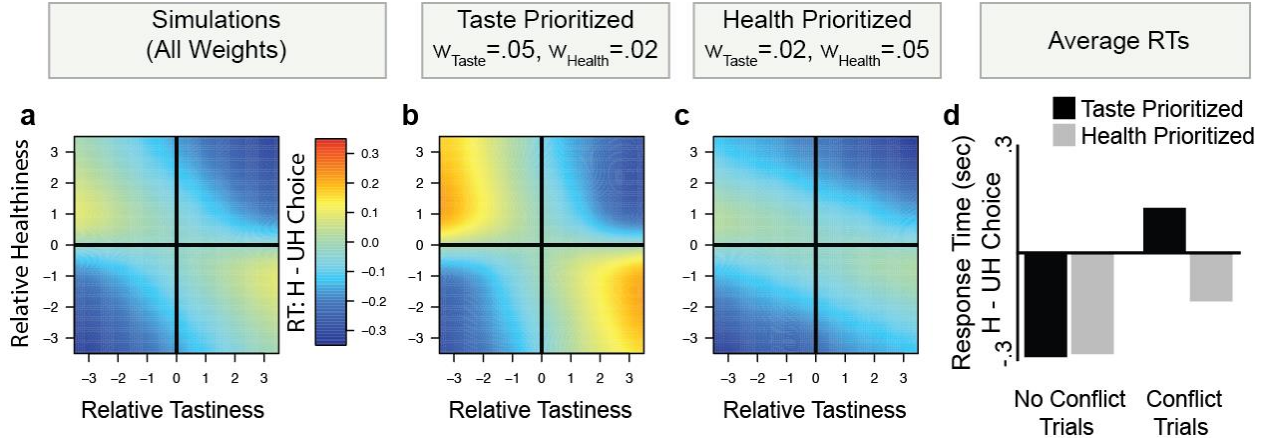

1061 **Figure S1.** Computational simulations of response time (RT). (a) Similar to neural response,  
1062 model simulations suggest that response times when making normative (i.e., healthy, H) choices  
1063 instead of hedonistic (i.e. unhealthy, UH) ones (i.e.,  $RT_H - RT_{UH}$ ) depends on relative healthiness  
1064 and tastiness for goal contexts that prioritize both (b) hedonism and (c) normative goals. Warmer  
1065 colors indicate longer RTs for healthy choices, indicated by larger differences in  $RT_H - RT_{UH}$ . (d)  
1066 Average differences in RT for health compared to unhealthy choices (averaging over different  
1067 options with different attribute values) are displayed for contexts in which health or taste are  
1068 prioritized, divided as a function of whether relative healthiness and tastiness conflict (i.e., take  
1069 opposite signs) or do not (no conflict trials). In no conflict trials, on average, healthy choices are  
1070 easy regardless of whether taste is prioritized (black bars) or health is prioritized (gray bars),  
1071 indicated by comparatively faster  $RT_H$  than  $RT_{UH}$ . In conflict trials, however, on average, healthy  
1072 choices are difficult only in when taste is prioritized (when  $w_{Taste} > w_{Health}$ ), reflected in relatively  
1073 longer  $RT_H$  than  $RT_{UH}$ .  
1074

1075  
1076  
1077

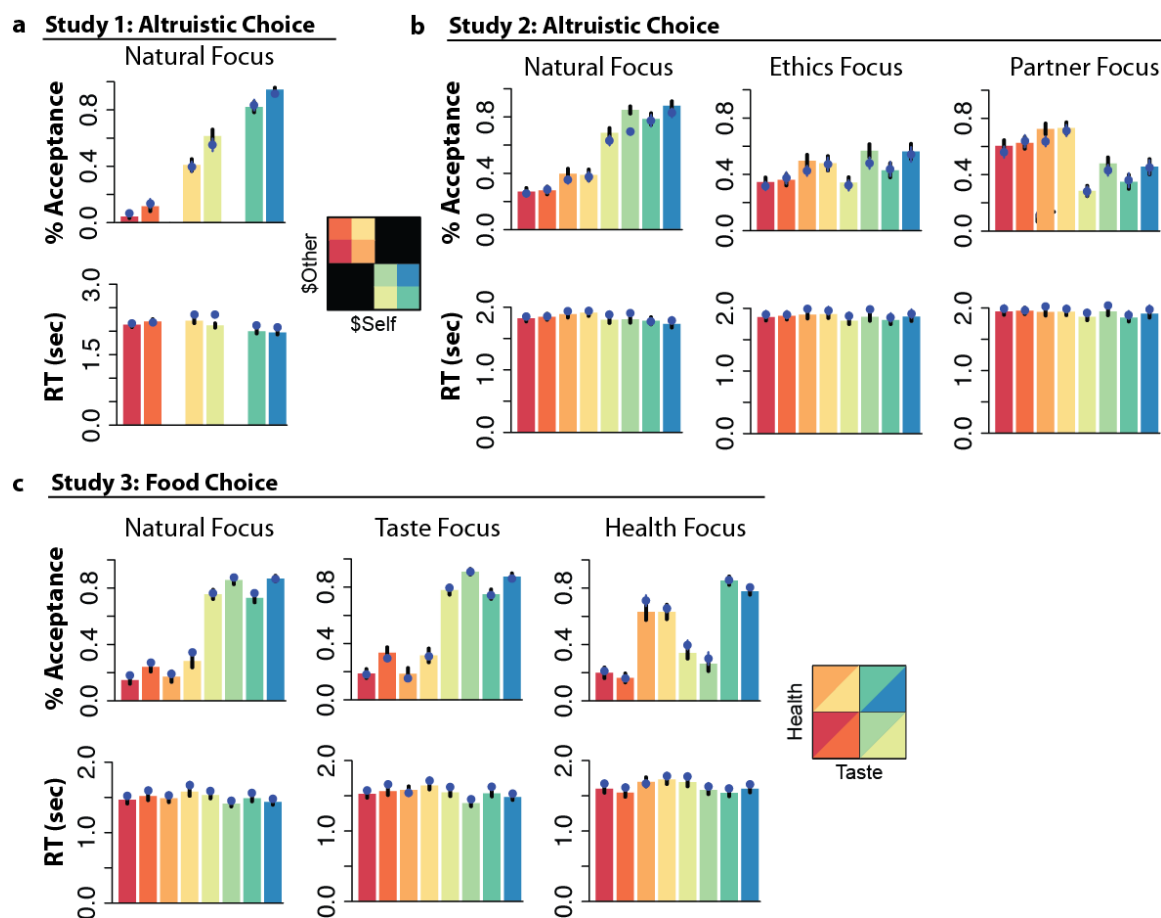

1078

1079 **Figure S2.** Model fits to behavior. (a) Choices and RTs for observed behavior (colored bars) and  
 1080 model simulations (blue dots) for different choice types in Study 1. (b) Observed and model-  
 1081 simulated choices and RTs in Study 2, separately by regulatory condition. (c) Observed and model-  
 1082 simulated choices and RTs in Study 3, separately by regulatory condition. Error bars show standard  
 1083 error of the mean.

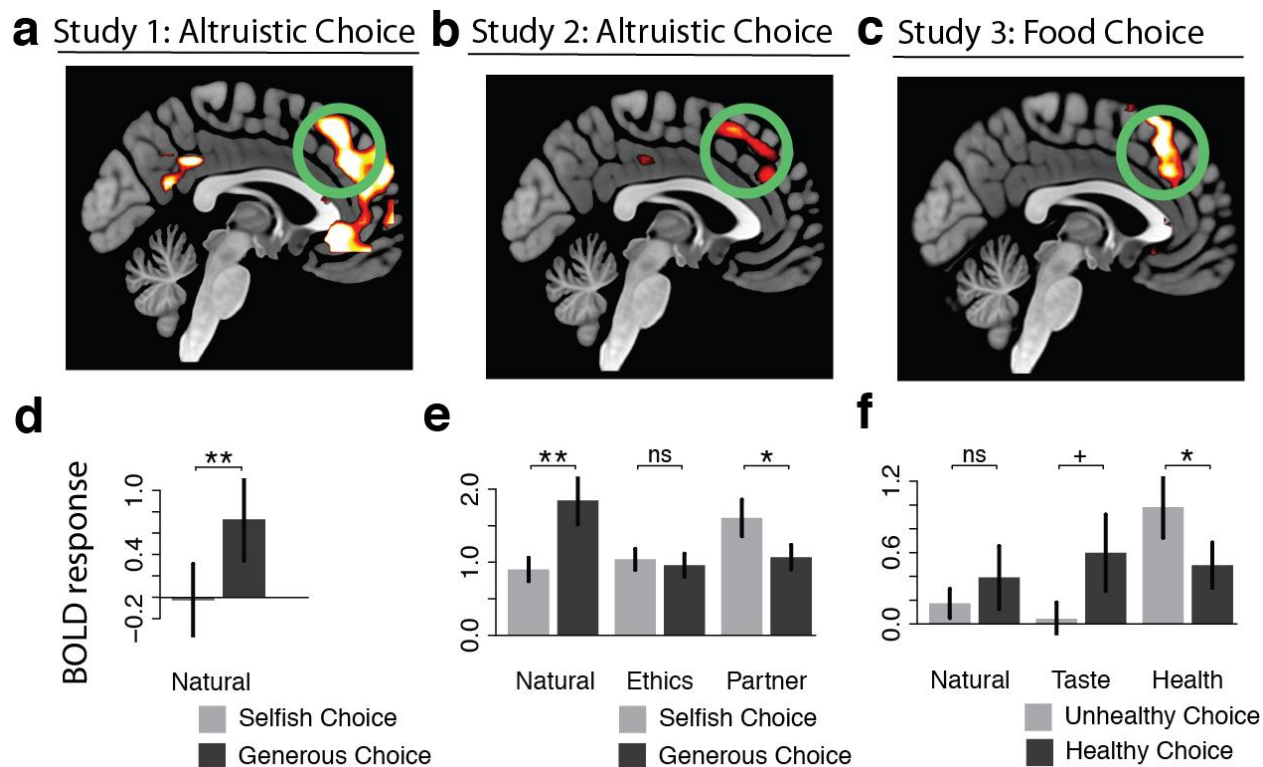

1084

1085 **Figure S3.** BOLD responses in the anterior cingulate cortex during self-control dilemmas. Top:  
 1086 Trial-by-trial BOLD response in the dACC correlates with predicted activity of the anDDM across  
 1087 three separate studies, including during both altruistic choice (**a**, **b**) and during dietary choice (**c**).  
 1088 All maps thresholded at  $P < .001$  uncorrected for display purposes. Bottom: Within the dACC ROI  
 1089 defined by the three-way conjunction of anDDM response across all studies, BOLD response  
 1090 during normative choice (black) vs. hedonistic choice (light gray) when attributes conflict, in **d**  
 1091 Study 1 for all trials, as well as in **e**) Study 2 and **f**) Study 3 as a function of regulatory goals. As  
 1092 predicted, normative choices activate the dACC, but only when goals result in a greater weight on  
 1093 hedonistic than normative attributes. +  $P < .05$ , one-tailed; \*  $P < .05$ ; \*\*  $P < .01$ .

1094

1095

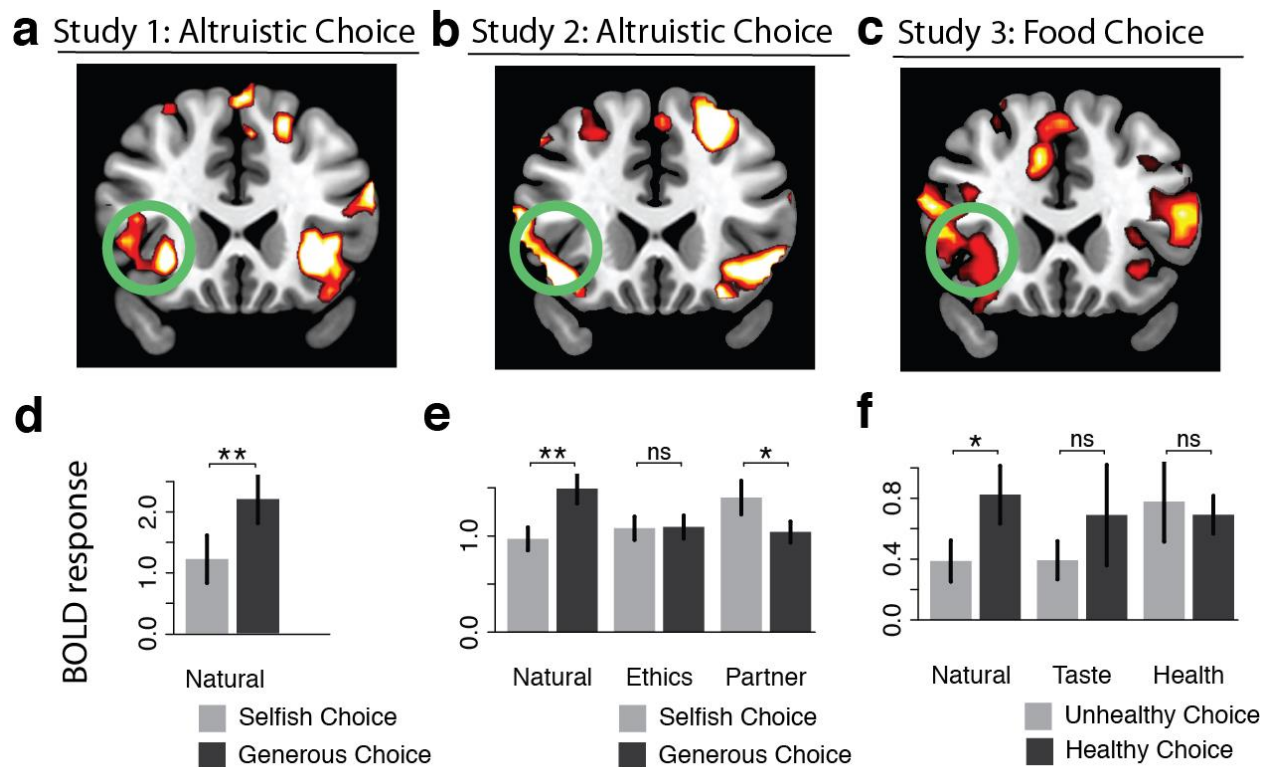

1096  
 1097 **Figure S4.** BOLD responses in the inferior frontal gyrus (IFG)/anterior insular cortex during self-  
 1098 control dilemmas. Top: Trial-by-trial BOLD response in the IFG/insula correlates with predicted  
 1099 activity of the anDDM across three separate studies, including during both altruistic choice (**a**, **b**)  
 1100 and during dietary choice (**c**). All maps thresholded at  $P < .001$  uncorrected for display purposes.  
 1101 Bottom: Within the IFG/insula ROI defined by the three-way conjunction of anDDM response  
 1102 across all studies, BOLD response during normative choice (black) vs. hedonistic choice (light  
 1103 gray) when attributes conflict, in **d**) Study 1 for all trials, as well as in **e**) Study 2 and **f**) Study 3 as  
 1104 a function of regulatory goals. As predicted, normative choices activate the IFG/insulas, but only  
 1105 when goals result in a greater weight on hedonistic than normative attributes. +  $P < .05$ , one-tailed;  
 1106 \*  $P < .05$ ; \*\*  $P < .01$ .

1107

**Table S1. Estimated Model Parameters**

| Parameter                | <i>A priori</i> constraints | Study 1      | Study 2, Natural          | Study 2, Ethics             | Study 2, Partner          | Study 3, Natural          | Study 3, Taste             | Study 3, Health           |
|--------------------------|-----------------------------|--------------|---------------------------|-----------------------------|---------------------------|---------------------------|----------------------------|---------------------------|
| <i>w</i> <i>Self</i>     | -.5 to +.5                  | .0036±.0011  | .0073±.0035 <sup>a</sup>  | .0061±.0047 <sup>a</sup>    | .0037±.0065 <sup>b</sup>  | -                         | -                          | -                         |
| <i>w</i> <i>Other</i>    | -.5 to +.5                  | .0008±.0015  | .001±.0038 <sup>a</sup>   | .0041±.0045 <sup>b</sup>    | .0051±.0038 <sup>b</sup>  | -                         | -                          | -                         |
| <i>w</i> <i>Fairness</i> | -.5 to +.5                  | .0008±.001   | .0017±.0033 <sup>a</sup>  | .0053±.0046 <sup>b</sup>    | .0024±.0035 <sup>a</sup>  | -                         | -                          | -                         |
| <i>w</i> <i>Taste</i>    | -.5 to +.5                  | -            | -                         | -                           | -                         | .0074±.0027 <sup>a</sup>  | .0077±.0029 <sup>a</sup>   | .002±.0028 <sup>b</sup>   |
| <i>w</i> <i>Health</i>   | -.5 to +.5                  | -            | -                         | -                           | -                         | -.0002±.0018 <sup>a</sup> | -.0008±.0018 <sup>a</sup>  | .0055±.0034 <sup>b</sup>  |
| <i>B</i>                 | 0 to +1.0                   | .3181±.1425  | .2773±.1373 <sup>a</sup>  | .3628±.1453 <sup>b</sup>    | .4062±.1586 <sup>b</sup>  | .1691±.0501 <sup>a</sup>  | .1821±.0616 <sup>a,b</sup> | .2009±.0819 <sup>b</sup>  |
| <i>ndt</i>               | 0 to +2.0s                  | .8002±.215   | .5989±.2219 <sup>a</sup>  | .4835±.1448 <sup>b</sup>    | .4859±.1322 <sup>b</sup>  | .5442±.1321 <sup>a</sup>  | .5397±.1361 <sup>a</sup>   | .5399±.1589 <sup>a</sup>  |
| $\zeta$                  | 0 to +2.0                   | .583±.3034   | .5531±.3086 <sup>a</sup>  | .7469±.2814 <sup>b</sup>    | .7592±.2806 <sup>b</sup>  | .4102±.0768 <sup>a</sup>  | .4093±.0865 <sup>a</sup>   | .3958±.0848 <sup>a</sup>  |
| $\gamma$                 | +1.0 to +3.0                | 1.8979±.3575 | 2.0148±.3881 <sup>a</sup> | 2.2043±.3744 <sup>a,b</sup> | 2.2952±.3467 <sup>b</sup> | 1.6435±.1279 <sup>a</sup> | 1.654±.1578 <sup>a</sup>   | 1.6802±.1455 <sup>a</sup> |

*Note.* Parameter values were estimated using a Differential-Evolution Markov Chain Monte Carlo method developed by Holmes and Trueblood<sup>1</sup>. Parameters beginning with *w* indicate weighting parameters applied to different attributes (Studies 1 and 2: proposed payoff to self vs. the default, proposed payoff to other vs. the default, and fairness [|\$Self - \$Other|]; Study 3: tastiness and healthiness vs. the default). *B*: choice-defining threshold. *ndt*: non-decision time.  $\zeta$ : lateral inhibition parameter from one neuronal pool onto the other.  $\gamma$ : auto-excitation parameter from a neuronal pool onto itself. *A priori* constraints on the parameters, determined based on previous work and on theoretical limits, restricted them to the range indicated. In Studies 2 and 3, columns indicated by different subscripts differ significantly from each other at  $P < .05$ , corrected for multiple comparisons.



Running head: DLPFC AND NORMATIVE CHOICE

1 **Table S2. Neural correlates of the attribute-based neural drift diffusion model across**  
 2 **studies**

| Region                           | Cluster  |      | Z score | x   | y   | z   |
|----------------------------------|----------|------|---------|-----|-----|-----|
|                                  | BA       | Size |         |     |     |     |
| <i>Study 1 (GLM 1a)</i>          |          |      |         |     |     |     |
| L Dorsal Anterior Cingulate      | 6/8/32   | 235  | 4.89    | -6  | 27  | 42  |
| L Inferior Frontal Gyrus         | 47       | 271  | 5.01    | -33 | 27  | -6  |
| R Inferior Frontal Gyrus         | 47       | 175  | 4.87    | 39  | 27  | -6  |
| L Dorsolateral Prefrontal Cortex | 45/46    | 60   | 4.32    | -57 | 21  | 24  |
| L Supplementary Motor Area       | 6/8      | 142  | 4.23    | -21 | 12  | 57  |
| R Inferior Parietal Lobule       | 40       | 319  | 5.76    | 54  | -66 | 36  |
| L Inferior Parietal Lobule       | 40       | 281  | 5.51    | -48 | -78 | 33  |
| <i>Study 2 (GLM 1b)</i>          |          |      |         |     |     |     |
| R Dorsal Anterior Cingulate      | 6/8/9/32 | 936  | 5.27    | -3  | 35  | 46  |
| L Inferior Frontal Gyrus         | 45/47    | 373  | 4.82    | -45 | 32  | -8  |
| R Inferior Frontal Gyrus         | 47       | 268  | 5.06    | 39  | 23  | -11 |
| L Dorsolateral Prefrontal Cortex | 45       | 7†   | 3.6     | -57 | 20  | 22  |
| L Middle Frontal Gyrus           | 6/8      | 293  | 4.52    | -24 | 20  | 52  |
| L Posterior Cingulate Cortex     | 31       | 100  | 5.12    | -6  | -40 | 34  |
| L Middle Temporal Gyrus          | 21       | 38   | 4.07    | -60 | -31 | -8  |
| L Inferior Parietal Cortex       | 39       | 285  | 5.57    | -39 | -70 | 40  |
| R Occipital Cortex               |          | 120  | 4.9     | 42  | -73 | 34  |
| <i>Study 3 (GLM 1c)</i>          |          |      |         |     |     |     |
| R Dorsal Anterior Cingulate      | 6/8/9/32 | 472  | 5.28    | 9   | 23  | 40  |
| R Dorsolateral Prefrontal Cortex |          | 684  | 5.21    | 54  | 23  | 19  |
| Inferior Frontal Gyrus           |          | *    | 4.11    | 33  | 17  | -11 |
| L Dorsolateral Prefrontal Cortex |          | 671  | 5.23    | -51 | 20  | 19  |
| Inferior Frontal Gyrus           | 47       | *    | 4.43    | -33 | 26  | -5  |

3 *Note.* Regions are reported at a voxel-level of  $P < .001$ , uncorrected and a whole-brain cluster  
 4 corrected level of  $P < .05$ , unless otherwise noted. \* Distinct peak within larger cluster. †  
 5 Significant at  $P < .05$ , small-volume corrected within a 10-mm spherical region of interest  
 6 centered on the left dlPFC.

## DLPFC AND NORMATIVE CHOICE

7 **Table S3. Differences in neural response for virtuous vs. hedonistic choices**

| Region                                                                  | Cluster |      | Z score | x   | y   | z   |
|-------------------------------------------------------------------------|---------|------|---------|-----|-----|-----|
|                                                                         | BA      | Size |         |     |     |     |
| <i>Study 1, Generous vs. Selfish (GLM2a)</i>                            |         |      |         |     |     |     |
| <u><i>anDDM Regions</i></u>                                             |         |      |         |     |     |     |
| L Dorsomedial Prefrontal Cortex                                         | 9/32    | 86   | 4.03    | -3  | 33  | 36  |
| R Dorsolateral Prefrontal Cortex                                        | 44/45   | 24   | 3.87    | 54  | 12  | 21  |
| L Dorsolateral Prefrontal Cortex                                        | 45/46   | 18*  | 3.06    | -45 | 12  | 18  |
| R Inferior Frontal Gyrus                                                | 47      | 23   | 4.12    | 30  | 21  | -12 |
| L Inferior Frontal Gyrus                                                | 47      | 13   | 3.73    | -42 | 39  | -3  |
| L Inferior Parietal Lobule                                              | 40      | 14   | 3.56    | -60 | -54 | 39  |
| <u><i>Other Regions</i></u>                                             |         |      |         |     |     |     |
| <i>No regions significant</i>                                           |         |      |         |     |     |     |
| <i>Study 2, Generous vs. Selfish, Natural Focus trials only (GLM2b)</i> |         |      |         |     |     |     |
| <u><i>anDDM Regions</i></u>                                             |         |      |         |     |     |     |
| L Dorsomedial Prefrontal Cortex                                         | 9/32/24 | 2225 | 5.21    | -3  | 11  | 67  |
| Dorsomedial Prefrontal Cortex                                           |         | **   | 4.79    | -9  | 38  | 37  |
| Dorsolateral Prefrontal Cortex                                          |         | **   | 3.85    | -42 | 14  | 31  |
| R Dorsolateral Prefrontal Cortex                                        | 46      | 38   | 3.68    | 57  | 23  | 25  |
| L Inferior Frontal Gyrus                                                | 47      | 381  | 5.21    | -42 | 20  | -8  |
| R Inferior Frontal Gyrus                                                | 47      | 10   | 3.47    | 33  | 17  | -11 |
| R Inferior Parietal Lobule                                              | 40      | 20   | 3.66    | 48  | -37 | 46  |
| L Inferior Parietal Lobule                                              | 40      | 180  | 4.42    | -39 | -67 | 46  |
| L Inferior Parietal Lobule                                              | 40      | 18   | 3.59    | -57 | -37 | 46  |
| <u><i>Other Regions</i></u>                                             |         |      |         |     |     |     |
| L Mid-Cingulate Cortex                                                  | 24      | 30   | 4.33    | -3  | -4  | 31  |
| R Posterior Cingulate Cortex                                            | 31      | 54   | 3.79    | 12  | -40 | 31  |
| R Inferior Parietal Lobule                                              | 40      | 32   | 3.76    | 48  | -58 | 46  |
| L Lingual Gyrus                                                         | 18      | 37   | 3.64    | -9  | -73 | 1   |
| R Cerebellum                                                            |         | 21   | 3.57    | 0   | -52 | -23 |
| L Frontal Pole                                                          | 10      | 11   | 3.38    | -9  | 62  | 13  |
| <i>Study 2, Generous vs. Selfish, Ethics Focus trials only (GLM2b)</i>  |         |      |         |     |     |     |
| <i>No regions significant</i>                                           |         |      |         |     |     |     |
| <i>Study 2, Generous vs. Selfish, Partner Focus trials only (GLM2b)</i> |         |      |         |     |     |     |
| <u><i>anDDM Regions</i></u>                                             |         |      |         |     |     |     |
| L Dorsomedial Prefrontal Cortex                                         | 24      | 54   | -3.64   | -3  | 41  | 22  |

## DLPFC AND NORMATIVE CHOICE

|                                  |    |     |       |    |    |    |
|----------------------------------|----|-----|-------|----|----|----|
| R Dorsolateral Prefrontal Cortex | 46 | 16* | -3.81 | 57 | 29 | 22 |
| R Inferior Frontal Gyrus         | 47 | 47* | -3.36 | 36 | 23 | -2 |

### Other Regions

*No regions significant*

---

### *Study 3, Healthy vs. Unhealthy, Natural Focus conflict trials only (GLM2c)*

---

#### anDDM Regions

|                                  |    |     |      |     |    |     |
|----------------------------------|----|-----|------|-----|----|-----|
| L Dorsomedial Prefrontal Cortex  | 9  | 23* | 3.82 | -12 | 29 | 37  |
| L Dorsolateral Prefrontal Cortex | 46 | 7*  | 3.02 | -48 | 26 | 16  |
| L Inferior Frontal Gyrus         | 47 | 21* | 3.09 | -27 | 20 | -11 |
| R Inferior Frontal Gyrus         | 47 | 14  | 3.99 | 30  | 20 | -8  |

#### Other Regions

|                        |  |    |      |    |    |    |
|------------------------|--|----|------|----|----|----|
| R Frontal Pole         |  | 38 | 4.19 | 9  | 62 | 4  |
| R Orbitofrontal Cortex |  | 16 | 3.6  | 39 | 41 | -5 |

---

### *Study 3, Healthy vs. Unhealthy, Taste Focus conflict trials only (GLM2c)*

---

#### anDDM Regions

|                                 |   |    |      |   |    |    |
|---------------------------------|---|----|------|---|----|----|
| R Dorsomedial Prefrontal Cortex | 9 | 8* | 3.02 | 6 | 23 | 46 |
|---------------------------------|---|----|------|---|----|----|

#### Other Regions

*No regions significant*

---

### *Study 3, Healthy vs. Unhealthy, Health Focus conflict trials only (GLM2c)*

---

*No regions significant*

8 *Note.* Regions are reported at a voxel-level threshold of  $P < .001$ , uncorrected, and a minimum  
9 volume of  $k = 10$  voxels, unless otherwise noted. \* Significant at  $P < .005$ , uncorrected, reported  
10 for completeness. anDDM regions are defined by their correspondence with predictions of the  
11 attribute-based neural drift diffusion model (anDDM, see Table S2).

## DLPFC AND NORMATIVE CHOICE

12  
13  
14  
15  
16  
17  
18  
19

### References

1. Holmes, W.R. & Trueblood, J.S. Bayesian analysis of the piecewise diffusion decision model. *Behav. Res. Methods* **50**, 730-743 (2018).
